# Supplementary material
Source: PubMed Central journal article supplement (PMC11293616)

## Table of contents

|                          |         |
|--------------------------|---------|
| Supplementary Notes      | page 2  |
| Supplementary Figure 1   | page 7  |
| Supplementary Figure 2   | page 8  |
| Supplementary Figure 3   | page 9  |
| Supplementary Figure 4   | page 11 |
| Supplementary Figure 5   | page 12 |
| Supplementary References | page 13 |
| Trial Protocol           | page 15 |

Supplementary Tables are provided in a separate .xlsx file.

## Supplementary Notes

### Supplementary Note: efficacy of nivo+ipi in SGC

One of the first 18 enrolled Cohort 1 ACC patients (stage 1) had a confirmed partial response (cPR) to nivo+ipi, leading to the accrual of 14 more patients in stage 2 in which one more cPR was seen—yielding a total ORR of 2/32 (6%) in Cohort 1 (**Extended Data Table 1**). The 17 Cohort 1 patients with SD as best response included one patient with an unconfirmed PR (39% TL regression) whose therapy was held for grade 2 treatment-related nephritis and who subsequently developed new brain metastases after the scan showing PR. Another patient was designated SD after being taken off-trial for toxicity and before subsequent treatment was started. Thirteen (41%) Cohort 1 patients had PD as best overall response (BOR), including three patients who died of disease before evaluable imaging was obtained. Fourteen patients were treated with study drugs beyond PD, which yielded no additional responses. The rate of clinical benefit (defined as PR or SD > six months) in the ACC cohort was 31% (10/32).

In Cohort 2 (non-ACC SGCs), 3/18 patients in stage 1 and 2/14 patients in stage 2 developed a cPR, leading to an objective response rate (ORR) of 16% in Cohort 2 (**Extended Data Table 1**). Two Cohort 2 patients had 100% target lesion (TL) regression but did not meet complete response criteria due to the persistence of non-TLs. Of the five cPR patients in Cohort 2, three had a PFS of 15.9–24.2 months before developing PD, one was censored without PD after a PFS of 26.7 months (continued nivo+ipi locally, off-trial), and one cPR patient remained on-study at data cut-off with a PFS of 28.0 months. The BOR was SD in eight (25%) patients and PD in 18 (56%) patients, including two with deaths due to disease and three patients with clinically evident, symptomatic PD before imaging was obtained. One patient in Cohort 2 went off-study for toxicity 1.4 months after study medication initiation and received subsequent off-study treatment before reliable response imaging was acquired; this patient was not evaluable for BOR and, per the statistical plan, this patient was counted

as a non-responder for the primary endpoint. Among the 12 SDC patients enrolled, 3 (25%) had a cPR, 1 (8%) SD, and 7 (58%) PD as BOR. The rate of clinical benefit in the non-ACC Cohort 2 was 19% (6/32). Ten Cohort 2 patients were treated beyond progression without additional responses.

### Supplementary Note: toxicity and tolerability of nivo+ipi

The median duration of study treatment was 3.9 (95% CI [2.5, 9.7]) and 2.3 (95% CI [1.8, 5.1]) months for Cohorts 1 and 2, respectively. Four patients (2 in each Cohort) received only one treatment dose. Sixty patients (94%) across both cohorts developed an adverse event (AE) of any grade that was deemed at least possibly related to treatment, of whom 24 patients (38%) had at least one treatment-related (TR) AE categorized as  $\geq$  Grade 3. A complete overview of all TRAEs observed in this trial is presented in **Supplementary Table 2**. The most common grade  $\geq 3$  TRAEs across both cohorts were diarrhea (6%), increased AST (6%), and fatigue (5%). While the main reason to cease study medication was disease progression (47/64, 73%), 11 patients (17%; 8 in Cohort 1, 3 in Cohort 2) came off-trial due to TRAEs—one each of Cohorts 1 and 2 came off-trial with simultaneous PD and a TRAE. An overview of TRAEs that led to the discontinuation of study medication in Cohort 1 and Cohort 2 (including patients who came off-trial for simultaneous PD and TRAE) is provided in **Supplementary Tables 3a** and **3b**, respectively.

### Supplementary Note: immunogenomic landscape of ACC and non-ACC SGCs

Only 2 of 25 investigated ACCs (8%) showed tumor cell positivity for PD-L1 (both with 1% of tumor cells positive; **Extended Data Fig. 1b**). In line with our prior findings<sup>1</sup>, ACCs had a low WES-based mutation count (median 31 non-synonymous mutations per exome [IQR 20–44], corresponding to a tumor mutational burden [TMB] of approximately one mutation per megabase [Mb]). The median TMB score for ACCs calculated using tNGS data (panels listed in **Supplementary Table 4**) for samples without WES was 2.8 muts/Mbp (IQR 1.8–3.5, **Extended Data Fig. 1b**). Adenoid cystic

carcinomas were nearly always diploid tumors (median ploidy of 2.0 [IQR 1.94–2.01], **Extended Data Fig. 1b**). One responding ACC tumor demonstrated whole genome duplication (Patient ID #5, **Supplementary Fig. 1**). Six of 31 (19%) genetically profiled ACC tumors harbored a *NOTCH1* mutation (**Extended Data Fig. 1b**), of which four (13%) had *NOTCH1* point mutations predicted to be activating and associated with poor prognosis in ACC<sup>1-4</sup> (**Supplementary Fig. 2**).

Among the non-ACC tumors (Cohort 2; **Extended Data Fig. 1c**), twelve samples were androgen receptor (AR) positive by IHC: 11 of the 12 SDCs (the remaining SDC had insufficient material for investigation) and 1 unclassified, high-grade SGC NOS. Four samples (all SDC) had HER2 overexpression by IHC (3+) or amplification by FISH or tNGS. PD-L1 positivity was seen in 5 of 22 (23%) non-ACC samples (median 5% [IQR 5–10%] of tumor cells positive; **Extended Data Fig. 1c**). As previously described<sup>5,6</sup>, *TP53* was often mutated (12 of 25 profiled non-ACCs, 48%), including in 9 of 11 (82%) profiled SDC tumors. The median WES-based mutation count per exome was 50 (IQR 36–76), while the median tNGS-based TMB score in samples without WES data was 3.5 (IQR 0.5–9.3) muts/Mbp (**Extended Data Fig. 1c**).

Comparing the immunogenomic profiles of ACCs and non-ACC SGC tumors, we observed that SDC samples had the lowest median tumor purity (49%), followed by non-ACC/SDC tumors (55%), and finally ACCs (68%;  $q=0.13$ ; **Supplementary Fig. 3a**)—possibly consistent with an inverse relationship between purity and immune infiltrate in the tumor microenvironment. In addition, a hyperploid state, defined as a mean ploidy  $>2.5^7$ , was often seen in SDCs (4/5 [80%]), while it was rare in ACC (1/21 [5%]) and non-ACC/SDC tumors (2/10 [20%]; **Supplementary Fig. 3b**). An antigen-presenting-machinery (APM) RNA signature<sup>8</sup> was found to be weakest in ACC and strongest in SDC tumors, in line with our previous findings<sup>9</sup>—though this was not statistically significant when considering multiple hypothesis testing ( $q=0.13$ , **Supplementary Fig. 3c**). In addition, gene expression of *PDCD1* and *CTLA4*, coding for the study medication’s targets PD-1 and CTLA-4, were highest in SDCs, intermediate in non-ACC/SDC, and lowest in ACC tumors (**Supplementary Fig.**

**3d**)—but adjusting for multiplicity, this difference only reached statistical significance for *PDCD1* ( $q=0.048$ ). For greater detail, we analyzed RNA signatures previously associated with the presence of individual immune cell populations<sup>10</sup>. We found that non-ACC tumors clustered in the more intensely T-cell infiltrated subgroup (**Supplementary Fig. 3e**). Signature values of three immune populations previously correlated with poor ICB response<sup>11</sup>—cancer-associated fibroblasts (CAFs), myeloid-derived suppressor cells (MDSCs), and M2-polarized tumor-associated macrophages (M2 TAMs)—were not significantly different between ACC, non-ACC/SDC, and SDC tumors (**Supplementary Fig. 3f**).

### Supplementary Note: chemokine gene expression and response

Chemokines CXCL9, -10, and -11, together with their main receptor CXCR3, are crucial for immune cell migration, differentiation, and activation<sup>12</sup>. A higher expression of *CXCL9*, *CXCL10*, and *CXCL11* genes has previously been associated with superior survival after ICB treatment across various solid tumors<sup>13-15</sup>. Using the pre-treatment RNAseq data generated in our trial, we analyzed the expression of *CXCL9*, *CXCL10*, and *CXCL11* in responding and non-responding tumors and found no statistically significant differences (**Supplementary Fig. 3g**).

### Supplementary Note: viral sequences in responding SGCs

To explore the presence of viral sequences in SGCs, we used VirDetect<sup>16</sup> to map non-aligning reads from RNA-seq to viral genomes (complete list in **Supplementary Table 5**). Viral reads were identified in only three samples (all pre-treatment). Interestingly, two of these three tumors were responsive to nivo+ipi (one ACC and one SDC, patients #5 and #44; 4 reads each) with a PFS superior to the median for Cohort 1 (4.4 months (95% CI [2.4, 8.3]) or Cohort 2 (2.2 months, 95% CI [1.8, 5.3]): 13.5 and 24.2 months for #5 and #44, respectively). The remaining tumor with viral reads (ACC patient #11; 2 reads) did not respond and had rapidly progressive disease (best % $\Delta$ TL +201%;

**Supplementary Table 6**). No viral sequences were detected in matched on-treatment samples (available for patients #5 and #11). While it is possible that viral antigens were associated with developing an immune response in some instances, we caution that these findings in a small number of tumors are preliminary and require further study in a larger cohort of SGC samples.

#### Supplementary Note: sequences of expanding tumor TCR clones identified in blood

The TCR clonotypes identified as significantly expanding in the tumor samples of three responding patients were tracked in the peripheral blood at the pre- and on-treatment time point, as visualized in **Fig. 3k** in the main manuscript file. A copy of this figure panel that includes the color legends indicating the unique rearrangements of these TCR clonotypes is provided in **Supplementary Fig 4**.

#### Supplementary Note: peripheral blood immune monitoring

The flow cytometry gating strategy used for the immune monitoring experiments (full panel listed in **Supplementary Table 7**, results in the main manuscript in **Extended Data Fig. 5**) is visualized in **Supplementary Fig. 5**.

## Supplementary Figures

### Supplementary Fig. 1

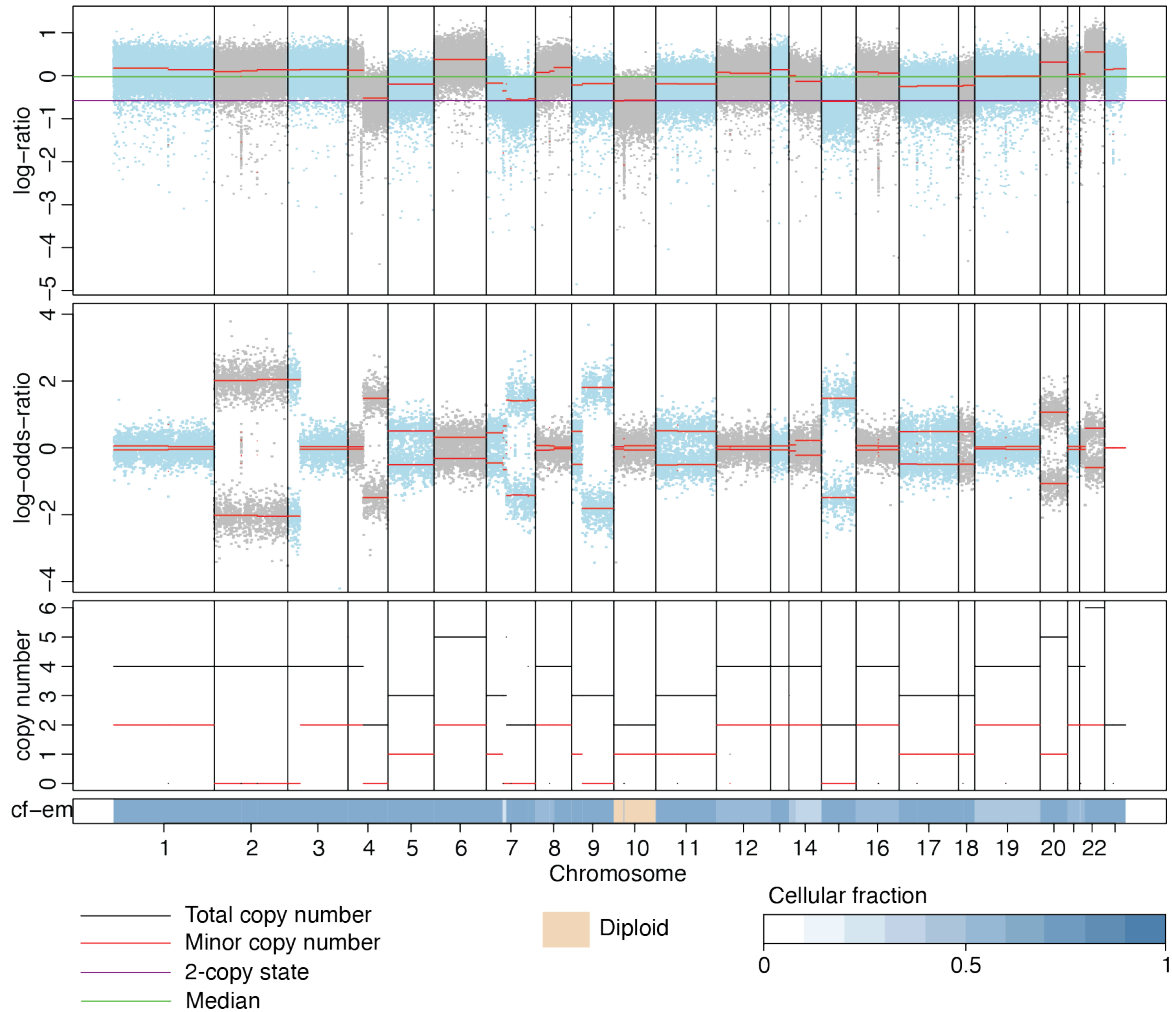

### Supplementary Fig. 1 | Copy number data generated using FACETS<sup>17</sup> reveal whole genome duplication in a responding ACC patient (#5)

The top panel shows the log-ratio of the total copy number. The second panel displays the allele-specific log-odds-ratio. In the top and second panel, chromosomes alternate in blue and gray. The third panel shows the total (black) and minor copy number calls (red). The purple and green line mark the 2-copy state and the median copy number, respectively. The estimated cellular fraction profile per allele is shown at the bottom.

## Supplementary Fig. 2

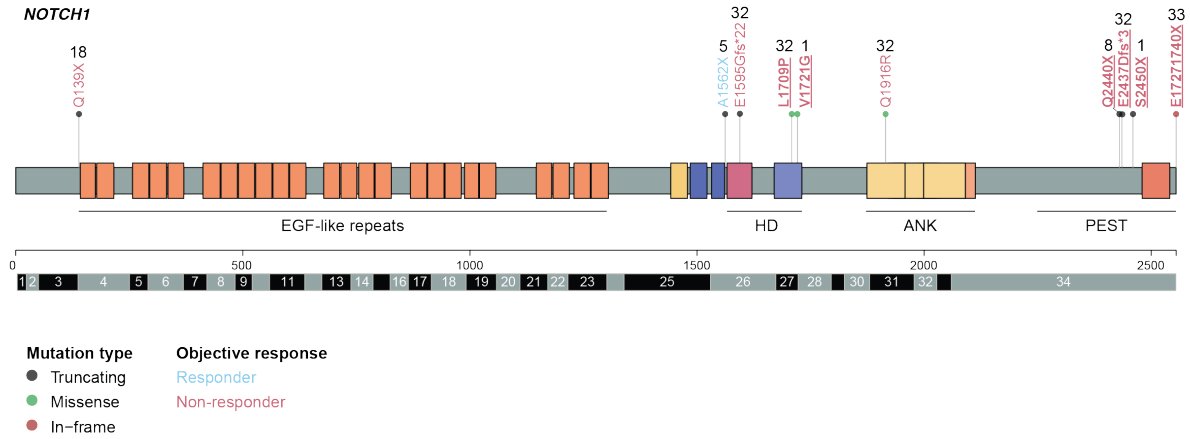

### Supplementary Fig. 2 | Lollipop plot showing the *NOTCH1*-mutations found in six ACC tumors

Variant text color represents response to nivo+ipi, lollipop dot color shows the mutation type. The numbers printed above the variants refer to the patient's trial ID. Variants considered *NOTCH1*-activating are underlined and printed in bold. The bottom bar shows the *NOTCH1* gene exons alternating in black and gray.



### Supplementary Fig. 3

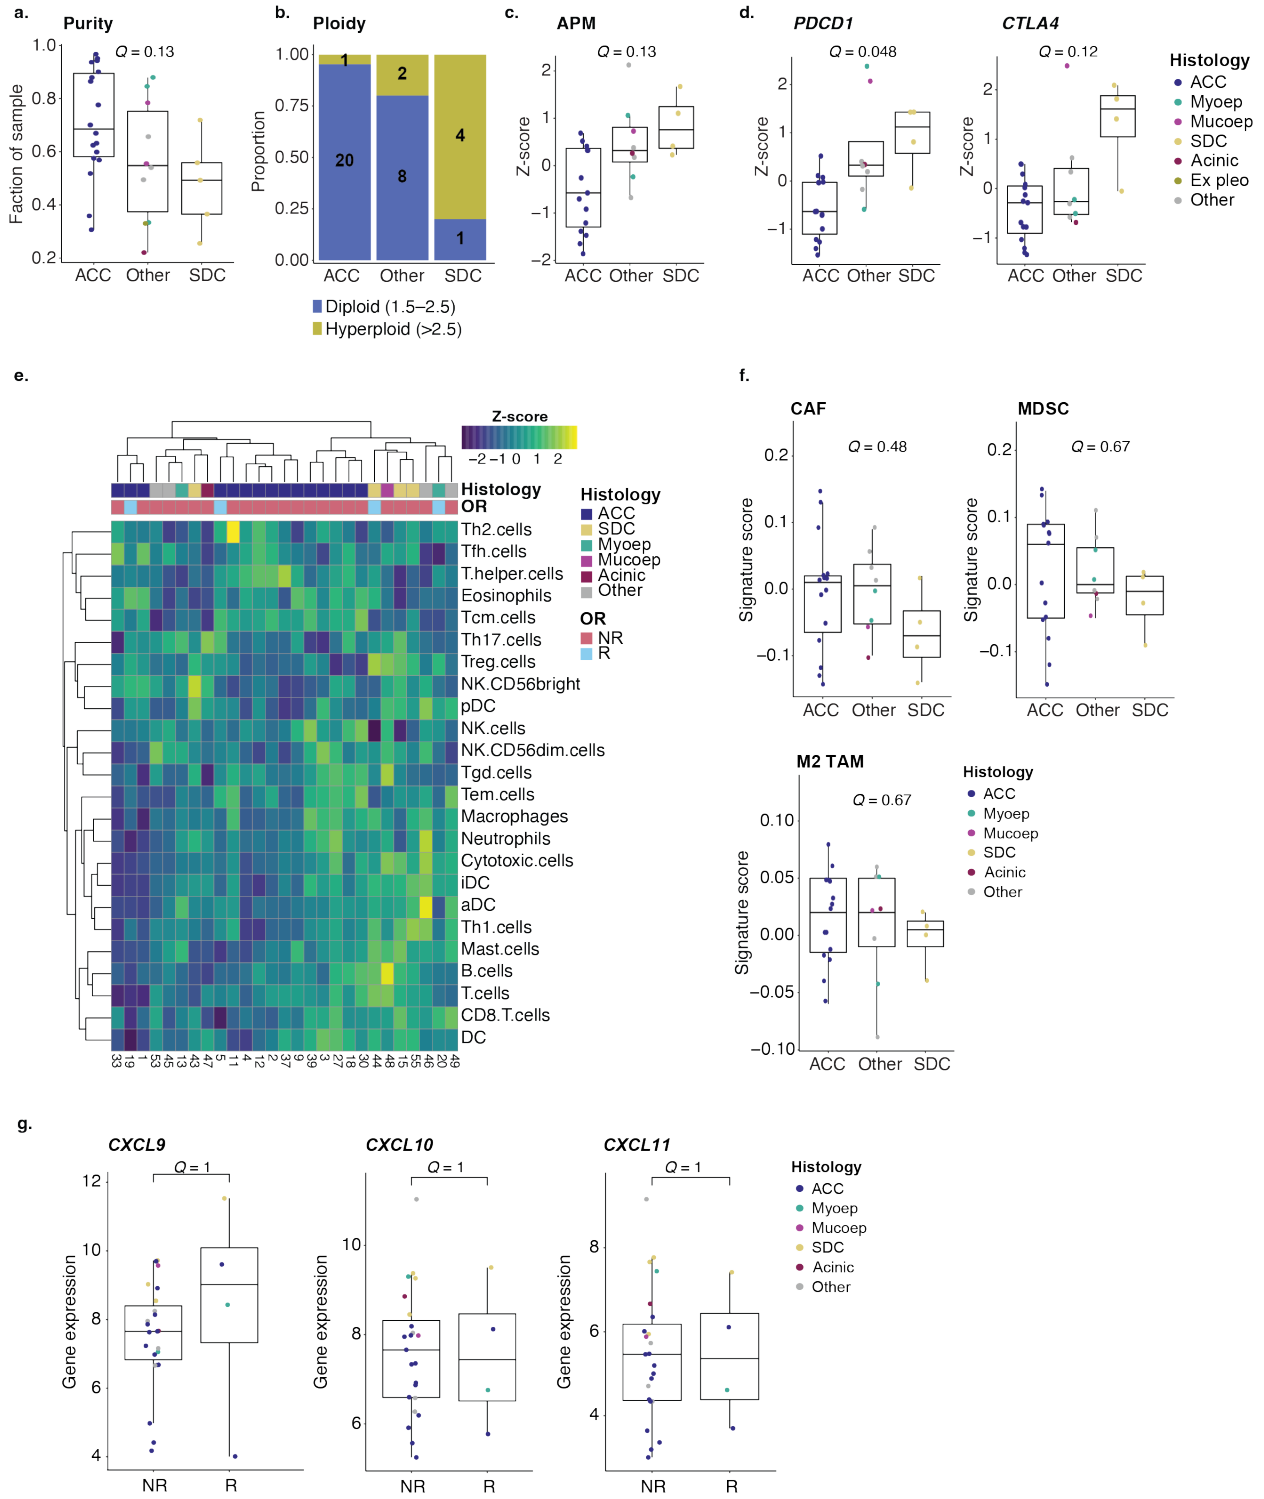

**Supplementary Fig. 3 | Supplementary analyses of the pre-treatment immunogenomic profiles of different SGC histologies, and the expression of chemokine genes in responding and non-responding tumors**

Boxes are defined in **Methods**. Individual dot colors in **a**, **c**, **d**, **f**, and **g** correspond to tumor histology. *P*-values in **a**, **c**, **d**, and **f** are calculated using a two-sided Kruskal-Wallis test; in **g**, a two-sided Wilcoxon rank sum test was used. *P*-values in **a**, **c**, **d**, **f**, and **g** were adjusted for multiplicity (see **Methods**), yielding *q*-values.

- a.** Pre-treatment tumor purity estimated from WES data<sup>17</sup> of ACC (n=18), SDC (n=5), and other SGC tumors (n=10).
- b.** Proportion of pre-treatment ACC, SDC, and other SGC tumor samples with a mean diploid (1.5–2.5) or hyperploid (>2.5) copy number, assessed using WES data<sup>17</sup>.
- c.** Pre-treatment Z-score for the antigen presentation machinery RNA signature<sup>8</sup> for ACC (n=15), SDC (n=4), and other SGC tumor samples (n=8), based on RNAseq data.
- d.** Pre-treatment Z-scores for the expression of checkpoint-encoding genes *PDCD1* (coding for PD-1) and *CTLA4* in ACC (n=15), SDC (n=4), and other SGC tumors (n=8), based on RNAseq data.
- e.** Heatmap of pre-treatment Z-scores for RNAseq-based signatures of 24 immune cell populations<sup>10</sup> for each sample. Top tracks correspond to histology and objective response.
- f.** Pre-treatment RNA signature values for the CAF, MDSC, and M2 TAM RNA signatures<sup>11</sup> in ACC (n=15), SDC (n=4), and other SGC tumor samples (n=8).
- g.** Pre-treatment gene expression values for *CXCL9*, *CXCL10*, and *CXCL11* in responding (n=4) and non-responding SGC samples (n=23), based on RNAseq data.

ACC, adenoid cystic carcinoma; SDC, salivary duct carcinoma; SGC, salivary gland cancer; WES, whole-exome sequencing; RNAseq, RNA sequencing; APM, antigen presentation machinery; OR, objective response; R, responder; NR, non-responder; CAF, cancer-associated fibroblast; MDSC, myeloid-derived suppressor cell; TAM, tumor-associated macrophage.

Supplementary Fig. 4

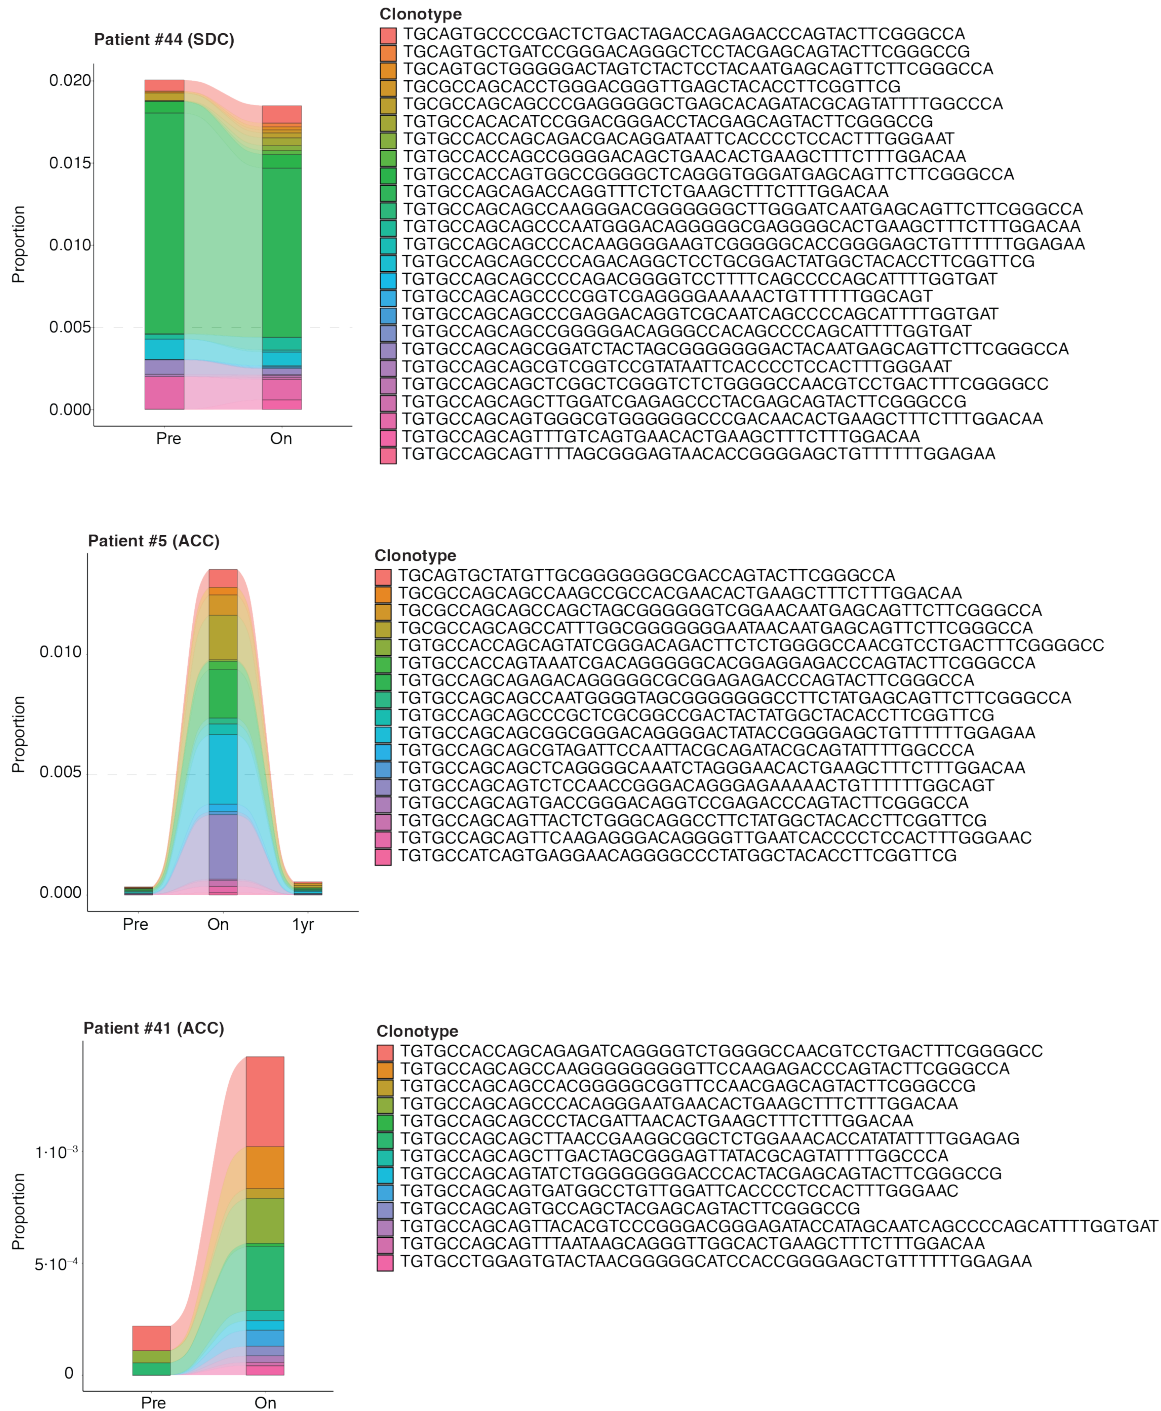

Supplementary Fig. 4 | Copy of peripheral blood tracking of intratumorally expanded TCR clones as shown in Fig. 3k, with color legends indicating clones' unique nucleotide rearrangements

Supplementary Fig. 5

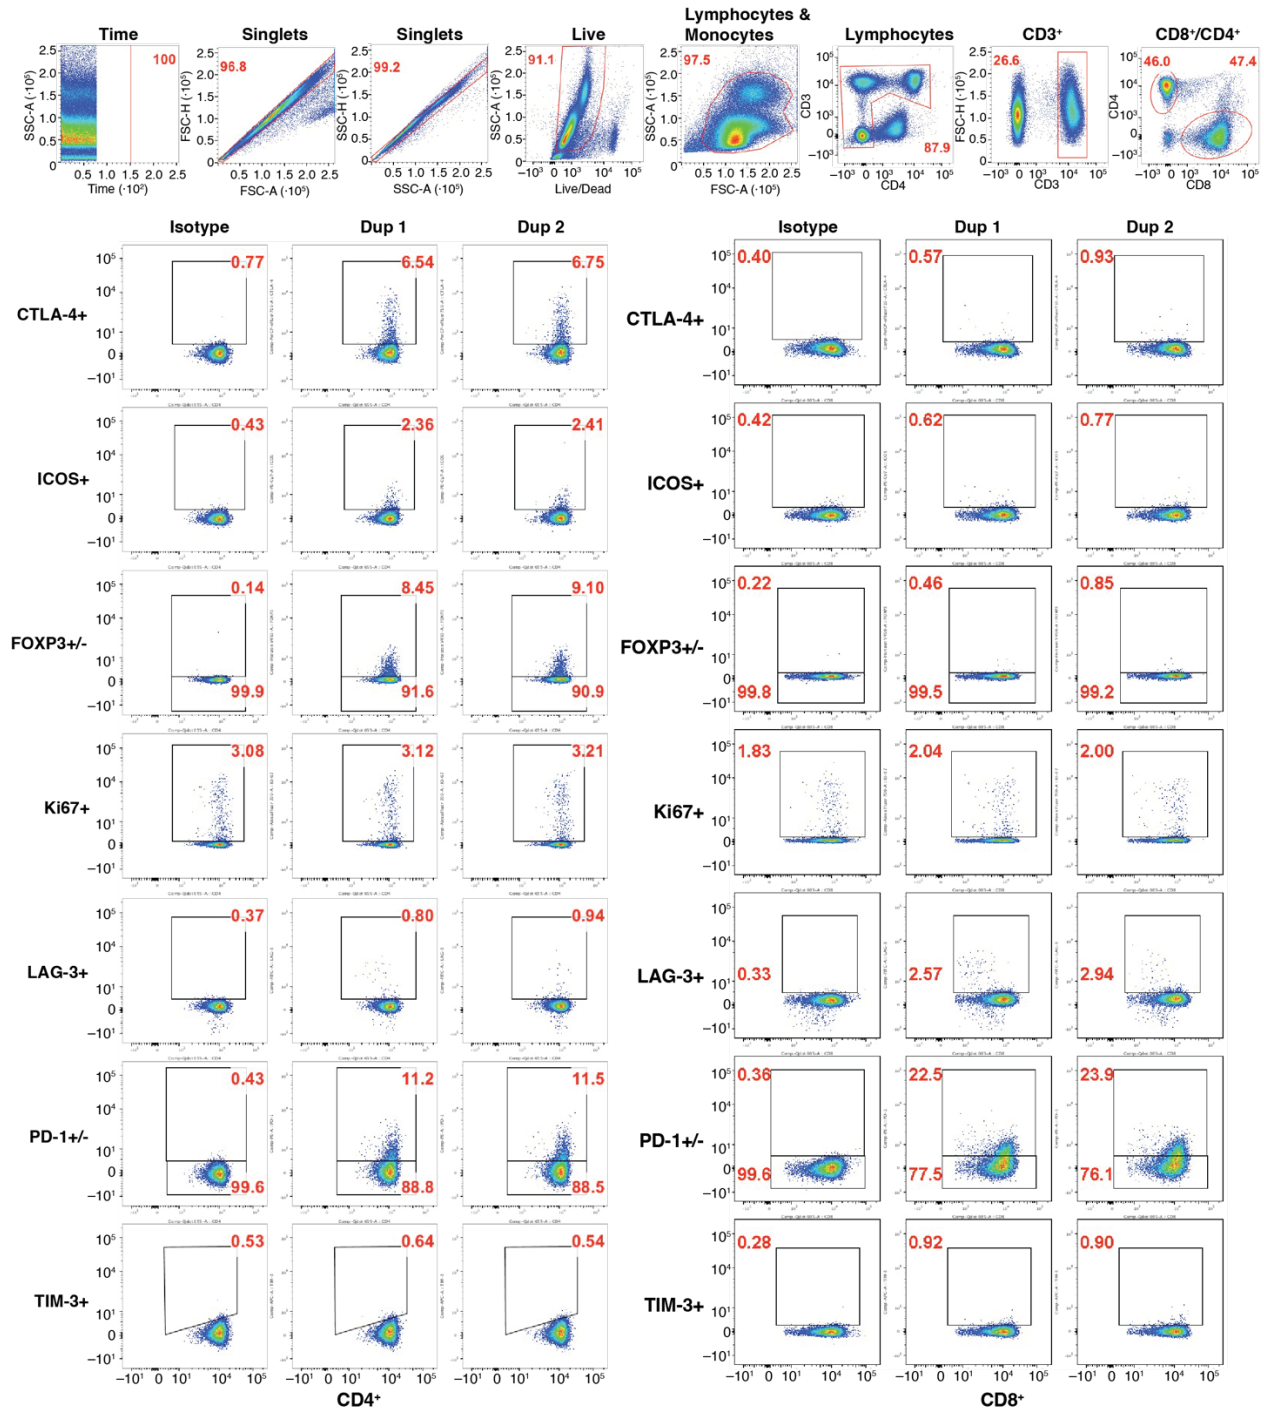

Supplementary Fig. 5 | Flow cytometry gating strategy for the T-cell activation and exhaustion panel in 27 Cohort 1 (ACC) patients

## Supplementary References

1. Ho, A.S., *et al.* Genetic hallmarks of recurrent/metastatic adenoid cystic carcinoma. *The Journal of Clinical Investigation* **129**, 4276-4289 (2019).
2. Weng, A.P., *et al.* Activating mutations of NOTCH1 in human T cell acute lymphoblastic leukemia. *Science* **306**, 269-271 (2004).
3. Breit, S., *et al.* Activating NOTCH1 mutations predict favorable early treatment response and long-term outcome in childhood precursor T-cell lymphoblastic leukemia. *Blood* **108**, 1151-1157 (2006).
4. Ferrarotto, R., *et al.* Activating NOTCH1 Mutations Define a Distinct Subgroup of Patients With Adenoid Cystic Carcinoma Who Have Poor Prognosis, Propensity to Bone and Liver Metastasis, and Potential Responsiveness to Notch1 Inhibitors. *Journal of Clinical Oncology* **35**, 352-360 (2017).
5. Dalin, M.G., *et al.* Comprehensive Molecular Characterization of Salivary Duct Carcinoma Reveals Actionable Targets and Similarity to Apocrine Breast Cancer. *Clinical Cancer Research* **22**, 4623-4633 (2016).
6. Kang, H., *et al.* Whole-Exome Sequencing of Salivary Gland Mucoepidermoid Carcinoma. *Clinical Cancer Research* **23**, 283-288 (2017).
7. Ciani, Y., *et al.* Allele-specific genomic data elucidate the role of somatic gain and copy-number neutral loss of heterozygosity in cancer. *Cell Syst* **13**, 183-193.e187 (2022).
8. Şenbabaoğlu, Y., *et al.* Tumor immune microenvironment characterization in clear cell renal cell carcinoma identifies prognostic and immunotherapeutically relevant messenger RNA signatures. *Genome Biology* **17**, 231 (2016).
9. Linxweiler, M., *et al.* The Immune Microenvironment and Neoantigen Landscape of Aggressive Salivary Gland Carcinomas Differ by Subtype. *Clinical Cancer Research* **26**, 2859-2870 (2020).

10. Bindea, G., *et al.* Spatiotemporal Dynamics of Intratumoral Immune Cells Reveal the Immune Landscape in Human Cancer. *Immunity* **39**, 782-795 (2013).
11. Jiang, P., *et al.* Signatures of T cell dysfunction and exclusion predict cancer immunotherapy response. *Nat Med* **24**, 1550-1558 (2018).
12. Tokunaga, R., *et al.* CXCL9, CXCL10, CXCL11/CXCR3 axis for immune activation – A target for novel cancer therapy. *Cancer Treatment Reviews* **63**, 40-47 (2018).
13. Shi, Z., *et al.* CXCL10 potentiates immune checkpoint blockade therapy in homologous recombination-deficient tumors. *Theranostics* **11**, 7175-7187 (2021).
14. Li, Y., *et al.* CXCL11 Correlates with Immune Infiltration and Impacts Patient Immunotherapy Efficacy: A Pan-Cancer Analysis. *Front Immunol* **13**, 951247 (2022).
15. Dangaj, D., *et al.* Cooperation between Constitutive and Inducible Chemokines Enables T Cell Engraftment and Immune Attack in Solid Tumors. *Cancer Cell* **35**, 885-900.e810 (2019).
16. Selitsky, S.R., *et al.* Virus expression detection reveals RNA-sequencing contamination in TCGA. *BMC Genomics* **21**, 79 (2020).
17. Shen, R. & Seshan, V.E. FACETS: allele-specific copy number and clonal heterogeneity analysis tool for high-throughput DNA sequencing. *Nucleic Acids Res* **44**, e131 (2016).

# Trial Protocol

A Phase II Study of Nivolumab plus Ipilimumab in Patients with Recurrent/Metastatic Salivary Gland Cancers  
**PROTOCOL FACE PAGE FOR  
 MSK THERAPEUTIC/DIAGNOSTIC PROTOCOL**

|                                          |                              |                    |
|------------------------------------------|------------------------------|--------------------|
| Principal Investigator/Department:       | Alan L. Ho, MD, PhD          | Medicine           |
| Co-Principal Investigator(s)/Department: | David G. Pfister, MD         | Medicine           |
| Investigator(s)/Department:              | Eric Sherman, MD             | Medicine           |
|                                          | Lara Dunn, MD                | Medicine           |
|                                          | James Fetten, MD             | Medicine           |
|                                          | Michelle S Ginsberg, MD      | Radiology          |
|                                          | Sofia Haque, MD              | Radiology          |
|                                          | Vaios Hatzoglou, MD          | Radiology          |
|                                          | Duan Li, MD                  | Radiology          |
|                                          | John Lyo, MD                 | Radiology          |
|                                          | Robert Young, MD             | Radiology          |
|                                          | Nora Katabi, MD              | Pathology          |
|                                          | Timothy Chan, MD, PhD        | Radiation Oncology |
|                                          | Nancy Lee, MD                | Radiation Oncology |
|                                          | Arlyn Apollo, MD             | Medicine           |
|                                          | Jacqueline Bromberg, MD, PhD | Medicine           |
|                                          | Philip Caron, MD             | Medicine           |
|                                          | Sree Chalasani, MD           | Medicine           |
|                                          | Daniel Danila, MD            | Medicine           |
|                                          | Avni Desai, MD               | Medicine           |
|                                          | Pamela Drullinsky, MD        | Medicine           |
|                                          | Julie Eng, MD                | Medicine           |
|                                          | Zoe Goldberg, MD             | Medicine           |
|                                          | Mila Gorsky, MD              | Medicine           |
|                                          | Ping Gu, MD                  | Medicine           |
|                                          | Audrey Hamilton, MD          | Medicine           |
|                                          | Afsheen Iqbal, MD            | Medicine           |
|                                          | Jason Konner, MD             | Medicine           |
|                                          | Neha Korde, MD               | Medicine           |
|                                          | Anuja Kriplani, MD           | Medicine           |
|                                          | Oscar Lahoud, MD             | Medicine           |
| Jia Li, MD                               | Medicine                     |                    |
| Stuart Lichtman, MD                      | Medicine                     |                    |
| Louise Ligresti, MD                      | Medicine                     |                    |
| Matthew Matasar, MD                      | Medicine                     |                    |
| Loren Michel, MD                         | Medicine                     |                    |
| Parisa Momtaz, MD                        | Medicine                     |                    |
| Azadeh Namakydoust, MD                   | Medicine                     |                    |
| Kenneth Ng, MD                           | Medicine                     |                    |





|  |                            |          |
|--|----------------------------|----------|
|  | Audrey Hamilton, MD        | Medicine |
|  | Afsheen Iqbal, MD          | Medicine |
|  | Jason Konner, MD           | Medicine |
|  | Neha Korde, MD             | Medicine |
|  | Anuja Kriplani, MD         | Medicine |
|  | Oscar Lahoud, MD           | Medicine |
|  | Jia Li, MD                 | Medicine |
|  | Stuart Lichtman, MD        | Medicine |
|  | Louise Ligresti, MD        | Medicine |
|  | Matthew Matasar, MD        | Medicine |
|  | Loren Michel, MD           | Medicine |
|  | Parisa Momtaz, MD          | Medicine |
|  | Azadeh Namakydoust, MD     | Medicine |
|  | Kenneth Ng, MD             | Medicine |
|  | Colette Owens, MD          | Medicine |
|  | Isabel Preeshagul, MD      | Medicine |
|  | Marina Shcherba, DO        | Medicine |
|  | Steven Sugarman, MD        | Medicine |
|  | Tiffany Troso-Sandoval, MD | Medicine |
|  | Stephen Veach, MD          | Medicine |
|  | Rui Wang, MD               | Medicine |
|  | Serena Wong, MD            | Medicine |
|  | Alice Zervoudakis, MD      | Medicine |
|  | Wanqing Iris Zhi, MD, PhD  | Medicine |
|  | Rachel Conybeare, NP       | Nursing  |

**Please Note: A Consenting Professional must have completed the mandatory Human Subjects Education and Certification Program.**

|                                         |
|-----------------------------------------|
| OneMSK Sites                            |
| Manhattan – All Protocol Activities     |
| Basking Ridge – All Protocol Activities |
| Commack – All Protocol Activities       |
| Monmouth – All Protocol Activities      |
| Westchester – All Protocol Activities   |
| Bergen – All Protocol Activities        |
| Nassau – All Protocol Activities        |

Memorial Sloan Kettering Cancer Center  
 1275 York Avenue  
 New York, New York 10065

Table of Contents

|             |                                                                       |           |
|-------------|-----------------------------------------------------------------------|-----------|
| <b>1.0</b>  | <b>PROTOCOL SUMMARY AND/OR SCHEMA</b>                                 | <b>5</b>  |
| <b>2.0</b>  | <b>OBJECTIVES AND SCIENTIFIC AIMS</b>                                 | <b>5</b>  |
| <b>3.0</b>  | <b>BACKGROUND AND RATIONALE</b>                                       | <b>6</b>  |
| <b>4.0</b>  | <b>OVERVIEW OF STUDY DESIGN/INTERVENTION</b>                          | <b>13</b> |
| 4.1         | Design                                                                | 13        |
| 4.2         | Intervention                                                          | 13        |
| <b>5.0</b>  | <b>THERAPEUTIC/DIAGNOSTIC AGENTS</b>                                  | <b>13</b> |
| <b>6.0</b>  | <b>CRITERIA FOR SUBJECT ELIGIBILITY</b>                               | <b>14</b> |
| 6.1         | Subject Inclusion Criteria                                            | 14        |
| 6.2         | Subject Exclusion Criteria                                            | 16        |
| <b>7.0</b>  | <b>RECRUITMENT PLAN</b>                                               | <b>17</b> |
| <b>8.0</b>  | <b>PRETREATMENT EVALUATION</b>                                        | <b>17</b> |
| <b>9.0</b>  | <b>TREATMENT/INTERVENTION PLAN</b>                                    | <b>18</b> |
| <b>10.0</b> | <b>EVALUATION DURING TREATMENT/INTERVENTION</b>                       | <b>24</b> |
| <b>11.0</b> | <b>TOXICITIES/SIDE EFFECTS</b>                                        | <b>26</b> |
| <b>12.0</b> | <b>CRITERIA FOR THERAPEUTIC RESPONSE/OUTCOME ASSESSMENT</b>           | <b>30</b> |
| <b>13.0</b> | <b>CRITERIA FOR REMOVAL FROM STUDY</b>                                | <b>36</b> |
| <b>14.0</b> | <b>BIostatISTICS</b>                                                  | <b>37</b> |
| <b>15.0</b> | <b>RESEARCH PARTICIPANT REGISTRATION AND RANDOMIZATION PROCEDURES</b> | <b>38</b> |
| 15.1        | Research Participant Registration                                     | 39        |
| 15.2        | Randomization                                                         | 39        |
| <b>16.0</b> | <b>DATA MANAGEMENT ISSUES</b>                                         | <b>39</b> |
| 16.1        | Quality Assurance                                                     | 39        |
| 16.2        | Data and Safety Monitoring                                            | 39        |
| <b>17.0</b> | <b>PROTECTION OF HUMAN SUBJECTS</b>                                   | <b>40</b> |
| 17.1        | Privacy                                                               | 41        |
| 17.2        | Serious Adverse Event (SAE) Reporting                                 | 41        |
| 17.2.1      |                                                                       | 42        |
| <b>18.0</b> | <b>INFORMED CONSENT PROCEDURES</b>                                    | <b>44</b> |
| <b>19.0</b> | <b>REFERENCES</b>                                                     | <b>44</b> |
| <b>20.0</b> | <b>APPENDICES</b>                                                     | <b>46</b> |

## 1.0 PROTOCOL SUMMARY AND/OR SCHEMA

This is a phase II study evaluating the efficacy of nivolumab in combination with ipilimumab in patients with recurrent and/or metastatic (R/M) salivary gland cancers (SGCs). Patients will be enrolled to two cohorts: Cohort 1, patients with R/M adenoid cystic carcinoma (“ACC group”), and Cohort 2: patients with R/M SGC of any histology, except ACC (“non-ACC group”). Patients will be required to have RECIST v1.1 measurable disease, any number of prior therapies, and no previous exposure to immunotherapeutic approaches. For the ACC cohort, patients with non-salivary primary sites would be allowed.

The primary endpoint for the study is best overall response rate (BOR = CR+PR) documented by RECIST v1.1 criteria. Secondary endpoints are progression-free survival (PFS) and safety/tolerability of the drug combination. These endpoints will be evaluated in each cohort separately. An exploratory endpoint is to analyze tumor tissue and peripheral blood cell subsets for potential biologic correlates of immune activation and efficacy with combination therapy.

Enrolled patients will be treated with nivolumab 3 mg/kg every 2 weeks plus ipilimumab 1 mg/kg every 6 weeks (1 cycle= 6 weeks). RECIST v1.1 response assessment will be at baseline and then approximately every 12 weeks (+/- 1 week) (or approximately every 2 cycles of combination treatment). Given the potential for delayed responses following short periods of disease progression, subjects may continue to receive therapy beyond radiographic progression in the absence of clinical deterioration and after discussion with the Principal Investigator. Patients will be continued on therapy until disease progression, unacceptable toxicity, patient withdrawal of consent, or investigator’s discretion. Adverse events will be monitored from the start of therapy until 30 days after the last dose of drug.

## 2.0 OBJECTIVES AND SCIENTIFIC AIMS

### Primary Objectives

To determine the best overall response rate (BOR) documented by RECIST v1.1 criteria of patients with recurrent/metastatic SGC treated with nivolumab and ipilimumab.

### Secondary Objective

To determine the progression-free survival (PFS) of patients with recurrent/metastatic SGC treated with nivolumab and ipilimumab.

To determine the safety/tolerability of nivolumab and ipilimumab in patients with recurrent/metastatic SGC.

### Exploratory Objectives

To identify in tumor tissue and peripheral blood cell subsets potential biologic correlates of efficacy with combination therapy.

■ [Redacted]

[Redacted]

[Redacted]

[Redacted]

[Redacted text block]

[Redacted text block]

[Redacted text block]

[Redacted text block]

[REDACTED]



[REDACTED]

[REDACTED]

[REDACTED]

[REDACTED]

[REDACTED]

[REDACTED]

[REDACTED]

[REDACTED]

[REDACTED]

[REDACTED]

[REDACTED]

[REDACTED]

[REDACTED]

[REDACTED]

[REDACTED]

[REDACTED]

[REDACTED]

[REDACTED]

[REDACTED]

[REDACTED]

#### 4.0 OVERVIEW OF STUDY DESIGN/INTERVENTION

##### 4.1 Design

This is a phase II study evaluating the efficacy of nivolumab in combination with ipilimumab in the treatment of patients with recurrent and/or metastatic (R/M) salivary gland cancers (SGCs). Patients will be enrolled to two cohorts: Cohort 1, patients with progressive, R/M adenoid cystic carcinoma (“ACC group”), and Cohort 2: patients with R/M SGC of any histology, except ACC (“non-ACC group”). Patients will be required to have RECIST v1.1 measurable disease, any number of prior therapies, and no previous exposure to immunotherapeutic approaches. For the ACC cohort, patients with non-salivary primary sites would be allowed, given that ACCs are biologically the same disease entity regardless of primary site.

The primary endpoint for the study is best overall response rate (BOR = CR+PR) documented by RECIST v1.1 criteria. Secondary endpoints are progression-free survival (PFS) and safety/tolerability of the drug combination. These endpoints will be evaluated in each cohort separately. An exploratory endpoint is to analyze tumor tissue and peripheral blood cell subsets for potential biologic correlates of immune activation and efficacy with combination therapy.

##### 4.2 Intervention

Enrolled patients will be treated with nivolumab 3 mg/kg every 2 weeks plus ipilimumab 1 mg/kg every 6 weeks (1 cycle= 6 weeks). Radiographic imaging and clinical assessments for RECIST v1.1 response assessment will be performed at baseline and then approximately every 12 weeks (+/- 1 week)(or approximately every 2 cycles). Given the potential for delayed responses following short periods of disease progression, subjects may continue to receive therapy beyond radiographic progression in the absence of clinical deterioration and after discussion with the Principal Investigator. Patients will be continued on therapy until disease progression, unacceptable toxicity, patient withdrawal of consent, or investigator’s discretion. Adverse events will be monitored from the start of therapy until 30 days after the last dose of drug.

■ [REDACTED]

|            |            |            |            |            |            |
|------------|------------|------------|------------|------------|------------|
| [REDACTED] |            |            |            |            |            |
| [REDACTED] | [REDACTED] | [REDACTED] | [REDACTED] | [REDACTED] | [REDACTED] |
| [REDACTED] | [REDACTED] | [REDACTED] | [REDACTED] | [REDACTED] | [REDACTED] |

|            |            |            |            |            |            |
|------------|------------|------------|------------|------------|------------|
| [REDACTED] |            |            |            |            |            |
| [REDACTED] | [REDACTED] | [REDACTED] | [REDACTED] | [REDACTED] | [REDACTED] |
| [REDACTED] | [REDACTED] | [REDACTED] | [REDACTED] | [REDACTED] | [REDACTED] |

[REDACTED]

[REDACTED]

[REDACTED]

[REDACTED]

[REDACTED]

[REDACTED]

[REDACTED]

**6.0 CRITERIA FOR SUBJECT ELIGIBILITY**

**NOTE:** All eligibility criteria noted below are applicable for both **Cohort 1 (ACC patients)** and **Cohort 2 (non-ACC patients)** patients, unless specifically noted otherwise.

**6.1 Subject Inclusion Criteria**

- **Cohort 1 only:** Patients must have pathologically or cytologically confirmed adenoid cystic carcinoma. Cancers arising from non-salivary gland primary sites are allowed.
- **Cohort 2 only:** Patients must have pathologically or cytologically confirmed salivary gland cancer of any histology except for adenoid cystic carcinoma.
- Patients must have recurrent and/or metastatic disease not amenable to potentially curative surgery or radiotherapy.
- At least 2 weeks must have elapsed since the end of prior systemic treatment and/or 4 weeks since completion of radiotherapy with resolution of all treatment-related toxicity to NCI CTCAE Version 4.0 grade  $\leq 1$  (or tolerable grade 2) or back to baseline (except for alopecia, lymphopenia, or hypothyroidism) prior to starting study drug treatment. Any number of prior therapies for recurrent/metastatic salivary gland cancer are allowed.

NOTE: Patients previously treated with hormonal therapies (e.g. drugs targeting the androgen receptor) may continue these drugs prior to trial enrollment and concomitantly with study therapy.

- Patients must have RECIST v1.1 measurable disease.
- **Cohort 1 and acinic cell carcinoma patients in Cohort 2 only:** Patients must have documentation of a new or progressive lesion on a radiologic imaging study performed within 6 months prior to study enrollment (progression of disease over any interval is

allowed) **and/or** new/worsening disease related symptoms within 6 months prior to study enrollment. Note: This assessment will be performed by the treating investigator. Evidence of progression by RECIST criteria is not required.

- Age  $\geq$  18 years.
- ECOG performance status 0 or 1 (or Karnofsky  $\geq$ 70%).
- Patients must have tissue from the primary tumor or metastases available for correlative studies. Either a paraffin block or at least 20 unstained slides are acceptable (30 unstained slides would be ideal). (If less than twenty unstained slides are available and a paraffin bloc is not available, the patient may be able to participate at the discretion of the investigator.)
- Patients must agree to undergo two research biopsies of (a) malignant lesion(s). Tumor tissue obtained prior to study consent or treatment as part of standard of care can also be submitted in lieu of performance of the first pre-treatment biopsy, if the Principal Investigator deems it to be of sufficient quantity/quality/timeliness. Patients may be exempt from biopsy if 1) the investigator or person performing the biopsy judges that no tumor is accessible for biopsy, 2) the investigator or person performing the biopsy feels that the biopsy poses too great of a risk to the patient, or 3) the patient's platelet count is  $<100,000/\text{mcl}$  or he/she cannot be safely removed from anti-coagulation therapy (if the anti-coagulation therapy needs to be temporarily held for the biopsy procedure). If the only tumor accessible for biopsy is also the only lesion that can be used for RECIST v1.1 response evaluation, then the patient may be exempt from biopsy. If the investigator deems a second research biopsy to be high risk after a patient has completed the first research biopsy, the patient may be exempt from the second biopsy.
- Screening laboratory values must meet the following criteria:
  - WBC  $\geq 2000/\mu\text{L}$
  - Neutrophils  $\geq 1500/\mu\text{L}$
  - Platelets  $\geq 100 \times 10^3/\mu\text{L}$
  - Hemoglobin  $> 9.0 \text{ g/dL}$
  - AST/ALT  $\leq 3 \times \text{ULN}$
  - Total Bilirubin  $\leq 1.5 \times \text{ULN}$  (except subjects with Gilbert Syndrome, who can have total bilirubin  $< 3.0 \text{ mg/dL}$ )
  - Serum creatinine  $\leq 1.5 \times \text{ULN}$  or creatinine clearance (CrCl)  $\geq 40 \text{ mL/min}$  (if using the Cockcroft-Gault formula below):

$$\text{Female CrCl} = \frac{(140 - \text{age in years}) \times \text{weight in kg} \times 0.85}{72 \times \text{serum creatinine in mg/dL}}$$

$$\text{Male CrCl} = \frac{(140 - \text{age in years}) \times \text{weight in kg} \times 1.00}{72 \times \text{serum creatinine in mg/dL}}$$

- Women of childbearing potential (WOCBP) must use appropriate method(s) of contraception. WOCBP should use an adequate method to avoid pregnancy for 23 weeks (30 days plus the time required for nivolumab to undergo five half-lives) after the last dose of investigational drug.

WOCBP is defined as any female who has experienced menarche and who has not undergone surgical sterilization (hysterectomy or bilateral oophorectomy) or who is not postmenopausal. Menopause is defined clinically as 12 months of amenorrhea in a woman over 45 in the absence of other biological or physiological causes.

Women who are not of childbearing potential are not required to use contraception.

- Women of childbearing potential must have a negative serum or urine pregnancy test upon study entry.
- Men who are sexually active with women of child bearing potential must use adequate contraception upon study entry until 31 weeks after the last dose of study treatment. Men who are surgically sterile or azoospermic do not require contraception.

## **6.2 Subject Exclusion Criteria**

- Symptomatic metastatic brain or leptomeningeal tumors (asymptomatic or treated metastatic brain or leptomeningeal tumors are allowed).
- Current or prior use of immunosuppressive doses of systemic corticosteroids (>10 mg/day prednisone equivalents) or other immunosuppressive medications within 2 weeks of study drug administration. NOTE: Subjects are permitted to use topical, ocular, intra-articular, intranasal, and inhalational corticosteroids (with minimal systemic absorption). Physiologic replacement doses of systemic corticosteroids are permitted, even if >10 mg/day prednisone equivalents. A brief course of corticosteroids for prophylaxis (e.g., contrast dye allergy) or for treatment of non-autoimmune conditions (eg, delayed-type hypersensitivity reaction caused by contact allergen) is permitted.
- Active, known, or suspected autoimmune disease within the past 2 years. NOTE: Subjects are permitted to enroll if they have vitiligo, type I diabetes mellitus, residual hypothyroidism due to autoimmune condition only requiring hormone replacement, psoriasis not requiring systemic treatment, or conditions not expected to recur in the absence of an external trigger
- Patients should be excluded if they have had prior systemic treatment with an anti-PD-1, anti-PD-L1, anti-PD-L2, anti-CTLA-4 antibody, or any other antibody or drug specifically targeting T-cell costimulation or immune checkpoint pathways.
- Patients should be excluded if they have a known history of testing positive for hepatitis B virus surface antigen (HBV sAg) or hepatitis C virus antibody (HCV antibody) indicating

acute or chronic infection (those with treated hepatitis B or C infection and a negative viral load prior to study entry would be eligible).

- Patients should be excluded if they have a known history of testing positive for human immunodeficiency virus (HIV) or known acquired immunodeficiency syndrome (AIDS)
- History of allergy to study drug components.
- History of severe hypersensitivity reaction to any monoclonal antibody.
- Women who are pregnant or breast-feeding.

## **7.0 RECRUITMENT PLAN**

Potential research subjects will be identified by a member of the patient's treatment team, the protocol investigator, or research team. Patient recruitment most likely will occur in the medical oncology clinics of the Head and Neck Disease management team. If the investigator is a member of the treatment team, s/he will screen their patient's medical records for suitable research study participants and discuss the study and their potential for enrolling in the research study. Potential subjects contacted by their treating physician will be referred to the investigator/research staff of the study. Investigators will discuss the study and review/sign the informed consent documents with the patient.

During the initial conversation between the investigator/research staff and the patient, the patient may be asked to provide certain health information that is necessary to the recruitment and enrollment process. The investigator/research staff may also review portions of their medical records in order to further assess eligibility. They will use the information provided by the patient and/or medical record to confirm that the patient is eligible and to contact the patient regarding study enrollment. If the patient turns out to be ineligible for the research study, the research staff will destroy all information collected on the patient during the initial conversation and medical records review.

It is anticipated the study will recruit 2-3 patients/months.

## **8.0 PRETREATMENT EVALUATION**

Within 30 days of starting treatment, the following tests need to be done:

- History and Physical Examination
- Vital signs (pulse, blood pressure), including weight
- Performance Status (ECOG or Karnofsky Performance Status)
- Radiology studies (CT or MRI) for disease assessment.



- Record of concomitant medications
- Signed Informed Consent Form
- Comprehensive Panel, including liver function tests (Albumin, alkaline phosphatase, total bilirubin, bicarbonate, BUN, calcium, chloride, creatinine, glucose, potassium, total protein, SGOT[AST], SGPT[ALT], sodium)
- Complete Blood Count (including platelets)
- Thyroid stimulating hormone (TSH) level
- Serum or urine beta-hcg (pregnancy test) in women of child-bearing potential (within 14 days of receiving study drug).
- Request for archival tumor tissue (if tissue is not already available at MSKCC, receipt of tissue is not required for study enrollment or initiation.)
- Research blood draw (this can be performed any time prior to start of study drug): approximately 10 mL of blood, preferably in a lavender top tube (with EDTA).
- Research peripheral blood collection: Peripheral blood samples will be collected in 4 CPT tubes (BD, 8-ml capacity, total blood volume collected~32 ml for PBMC purification for flow cytometric analysis) and 1 PAXgene tube (BD order #762165 or equivalent) (for purification of RNA/DNA for TCR analysis). The Cycle 1, Week 1 sample should be obtained prior to drug administration, but not more than 3 days prior to the start of treatment.
- Research tumor biopsy: The first of two research biopsies will be performed any time prior to Week 1 Day 1. Tumor tissue obtained prior to study consent or treatment as part of standard of care can also be submitted in lieu of performance of the first pre-treatment biopsy, if the Principal Investigator deems it to be of sufficient quantity/quality/timeliness. Patients may be exempt from biopsy if 1) the investigator or person performing the biopsy judges that no tumor is accessible for biopsy, 2) the investigator or person performing the biopsy feels that the biopsy poses too great of a risk to the patient, or 3) the patient's platelet count is <100,000/mcl or he/she cannot be safely removed from anti-coagulation therapy (if the anti-coagulation therapy needs to be temporarily held for the biopsy procedure). Radiologic guidance (CT, MRI or ultrasound guided) approaches and obtaining multiple cores to ensure sufficient biopsy material (at least 3 cores preferred) are allowed as long as it is considered safe for the patient. If the only tumor accessible for biopsy is also the only lesion that can be used for RECIST v1.1 response evaluation, then the patient may be exempt from biopsy. If the investigator deems a second research biopsy to be high risk after a patient has completed the first research biopsy, the patient may also be exempt from the second biopsy.

## 9.0 TREATMENT/INTERVENTION PLAN

### 9.1 Administration

Nivolumab and ipilimumab according to the following dose/schedule (1 cycle= 6 weeks):

Nivolumab: 3 mg/kg IV every 2 weeks

Ipilimumab: 1 mg/kg IV every 6 weeks

When study drugs (ipilimumab or nivolumab) are to be administered on the same day, separate infusion bags and filters must be used for each infusion. It is recommended that nivolumab be administered first. The second infusion will always be ipilimumab, and will start approximately 30 minutes after completion of the nivolumab infusion. At the investigator's discretion patients can be treated with nivolumab alone after 4 cycles for safety concerns. Specifically, if the patient experiences low grade toxicities (grade 1 or 2) related to study treatment that do not mandate discontinuing or holding study drugs, but which the Investigator judges may worsen with further combination treatment, the Investigator may use his or her discretion to discontinue ipilimumab after 4 cycles of treatment (not mandatory).

BMS-936558 (nivolumab) is to be administered as a 60 minute IV infusion. Ipilimumab should then be administered as a 90 minute infusion.

Ipilimumab and nivolumab may be diluted in 0.9% Sodium Chloride Solution or 5% Dextrose solution.

The dosing calculations should be based on the body weight.

**If the subject's weight on the day of dosing differs by > 10% from the weight used to calculate the dose, the dose must be recalculated. If the subject's weight differs by 10% or less from the weight used to calculate the dose, the dose may be continued based on the previous calculation or re-calculated based on the patient's new weight per investigator discretion.** All doses should be rounded as per institutional standard practice.

## **9.2 Concomitant Medications and Therapies**

All medication that is considered necessary for the subject's welfare, and which is not expected to interfere with the evaluation of the study treatment, may be given at the discretion of the investigator.

Permitted concomitant therapy includes:

- Standard therapies for concurrent medical conditions.
- Supportive care for any underlying illness.
- Palliative (limited-field) radiation therapy is permitted, if all of the following criteria are met:
  - The lesion being considered for palliative radiation is not being used as (a) RECIST measurable target lesion(s) for disease assessment on this study.
- Treatment with nonconventional therapies (such as acupuncture), and vitamin/mineral supplements are permitted provided that the therapy does not interfere with the study endpoints, in the opinion of the investigator.
- Bisphosphonates or denosumab.

- Subjects who are therapeutically treated with an agent such as warfarin or heparin will be allowed to participate provided that their medication dose and INR/PTT are considered stable by the treating physician.
- Concurrent administration of study drug(s) with corticosteroid use to treat or prevent an immune related adverse event is allowed.

### **9.3 Schedule of Events (for ALL patients initiating treatment)**

- 9.3.1 Patients will initiate treatment with nivolumab and ipilimumab on Week 1. This will occur in the outpatient setting. Required laboratory tests (detailed in **Section 10**) can be performed up to 7 days prior to initiation of treatment. It is unnecessary to repeat these laboratory tests if the screening assessments of the same tests were performed within 7 days prior to first dose of therapy. All other Week 1 evaluations (detailed in **Section 10**) may be performed up to 3 days prior to initiation of study treatment.
- 9.3.2 Evaluations during treatment will be performed according to the schedule detailed in **Section 10**.
- 9.3.3 Guidelines for dose reductions are provided in **Section 11**.
- 9.3.4 Tumor measurements with CT and/or MRI will be performed as outlined in **Section 10**.
- 9.3.5 Treatment may be discontinued at any time for progression of disease, unacceptable toxicity, patient withdrawal of consent, patient non-compliance, or investigator judgment.
- 9.3.6 Given the potential for delayed responses following short periods of disease progression, subjects may continue to receive therapy beyond radiographic progression in the absence of clinical deterioration and after discussion with the Principal Investigator.

### **9.4 Correlative Studies**

Exploratory objective: To identify in tumor tissue and peripheral blood cell subsets potential biologic correlates of immune activation and efficacy with combination therapy.

#### ***Tumor Analysis***

*(in collaboration with Tim Chan's laboratory in the Human Oncology Pathogenesis Program at MSKCC)*

Rationale: We hypothesize that interfering with the PD-1/PD-L1 and CTLA-4 axes with the nivolumab/ipilimumab combination can result in the loss of tolerance to immunogenic SGC antigens/neoantigens which may be identified through genomic analysis of the tumors. Other molecular/genetic correlates to benefit with immunotherapeutic approaches identified in other disease settings will also be explored, including PD-L1 expression, tumor mutation burden, and neoantigen load. To evaluate the potential correlation of these factors to

therapeutic efficacy, we will perform whole exome and transcriptome analysis in fresh research biopsies and/or archival tissues.

Approach: The research biopsy samples will be divided for fixation and flash freezing at the discretion of the Principle Investigator. These samples will be used to evaluate the genomic and transcriptomic landscape of the tumors. Archival tissues may also be used if of sufficient quantity and quality.

DNA and RNA will be extracted from frozen samples and/or paraffin tissue. The research peripheral blood sample collected on the study will be used as a control, matched normal sample (microdissection of normal tissue in the tumor samples may also be used for this purpose).

DNA will be submitted for next generation sequencing, possibly whole exome or whole genome sequencing. The specific assay that will be employed to analyze for genomic alterations will be dependent upon the technology available at the time of analysis and the amount of DNA extracted. Comparisons of DNA between tumor and normal tissue (from the research blood draw) will be performed as appropriate, thus generating germline sequence data. There is no intention to analyze the germline data beyond utilizing it as a normal control for the tumor tissue analysis, and generally germline data will not be communicated to the patient. This data will be used to quantitate mutation load and formulate a neoantigen score.

Extracted RNA will be analyzed with RNAseq technology, or alternative assays, depending on technical limitations/assay availability. Computational approaches will also enable analysis of baseline immune infiltrates present in the tumor, including that of CD4, CD8, and Tregs. PD-L1 transcript levels on tumor cells will also be quantified. RNA data will also be used to define a set of expressed neoepitopes and explore gene expression signatures that may correlate with response.

Frozen tissues from the research biopsy may be evaluated for relevant protein targets by Western blot or other proteomic assays that may be available at time of analysis.

Fixed archival and/or research biopsy tissues may also be evaluated by immunohistochemistry (IHC) to assess changes in tumor immune infiltrates and tumor/immune cell protein expression (e.g. PD-L1 status). For patients in whom sufficient fresh tissue can be collected in the research biopsies, the tumor immune cell infiltrate (or tumor infiltrating lymphocytes (“TILs”)) may be extracted and characterized by cytometric techniques, including flow cytometry or mass cytometry (CyTOF). PD-L1 status will be evaluated by immunohistochemistry in MSK laboratories and/or BMS.

For patients in whom two serial research biopsies are obtained, evolution of the mutation, neoantigen, and gene expression landscape in pre- and post-treatment samples will be analyzed to gain insights into immunoeediting that may occur and infer what epitopes may be critical for efficacy. The gene expression data (RNAseq or other) data can be analyzed to evaluate how immune cell tumoral infiltration and immunologic gene signatures may change with therapy.

Note regarding genomic and transcriptomic analysis: In the course of this research it is possible that some patients whose tumors are analyzed through investigational “next-generation” profiling in a research (non-CLIA) environment will be found to have somatic or germline mutations in genes that are known to be associated with an increased risk of cancer or other diseases. It will be stated in the consent that the participants will not receive any specific results from research tests. The consent will tell participants that if they wish to have genetic testing done for personal reasons than they should make an appointment with the MSK Clinical Genetics Service.

If in the course of this research a research finding is obtained that, in the opinion of the investigator, may be critical to the preventive care of the participant or their family, the investigator can communicate that finding to the IRB Genomic Advisory Panel (GAP). The finding will be reviewed by the GAP to determine whether the incidental finding should be discussed with the participant. For MSK, in the event that the GAP determines that the finding should be discussed with the participant, and the participant has consented to be re-contacted, then the treating/consenting physician shall be contacted by the panel and asked to refer the participant to the Clinical Genetics Service for further discussion of the research finding.

The following information must be provided to GAP for review:

- Participant Name/MRN #
- Type of Biospecimen (tissue, blood, saliva)
- Incidental Finding
- Collection Protocol #
- Contact: [REDACTED]

### ***Peripheral Blood Analysis***

*(in collaboration with Tim Chan’s laboratory in the Human Oncology Pathogenesis Program and the Immune Monitoring Core Facility at MSK)*

Rationale: We hypothesize that the impact of disrupting the PD-1/PD-L1 and CTLA-4 axes with the nivolumab/ipilimumab combination upon peripheral blood immune populations will correlate to clinical efficacy of therapy in SGC patients.

Approach: At the time points indicated in **Section 10**, peripheral blood samples will be collected: 4 CPT tubes (BD, 8-ml capacity, total blood volume collected~32 ml for PBMC purification for flow cytometric analysis) and 1 PAXgene tube (BD order #762165 or equivalent) (for purification of RNA/DNA for TCR analysis). Changes to these methods may be adapted depending upon the most recent, generally accepted protocols. Flow cytometry will be used to evaluate changes in T cell subsets at different time points. Alternative approaches to this analysis may be pursued depending upon the availability of new technologies, platforms, or approaches. Specifically, assays investigating the immunogenicity of tumoral antigens in *ex vivo* assays utilizing these collected PBMCs may be of value and will be performed to identify potential neoantigens or self antigens that are critical for mediating therapeutic efficacy.



## 10.0 EVALUATION DURING TREATMENT/INTERVENTION

All evaluations/tests and research collections may be performed up to 3 days prior to the patient being treated.

| Cycle/Week of Therapy<br>(1 cycle=6 weeks)        | Pre-Study <sup>a</sup> | Cycle 1<br>Week 1 <sup>l</sup>                                                                                                                                                                    | Cycle 1<br>Week 3 | Cycle 1<br>Week 5 | Cycle 2+ <sup>f</sup><br>Week 1 | Cycle 2+ <sup>f</sup><br>Week 3 | Cycle 2+ <sup>f</sup><br>Week 5 | Off Study <sup>g</sup> |
|---------------------------------------------------|------------------------|---------------------------------------------------------------------------------------------------------------------------------------------------------------------------------------------------|-------------------|-------------------|---------------------------------|---------------------------------|---------------------------------|------------------------|
| <b>Weeks on study</b>                             | -                      | 1                                                                                                                                                                                                 | 3                 | 5                 | 7                               | 9                               | 11                              | -                      |
| Nivolumab <sup>b</sup>                            |                        | X                                                                                                                                                                                                 | X                 | X                 | X                               | X                               | X                               |                        |
| Ipilimumab <sup>b</sup>                           |                        | X                                                                                                                                                                                                 |                   |                   | X                               |                                 |                                 |                        |
| Informed consent                                  | X                      |                                                                                                                                                                                                   |                   |                   |                                 |                                 |                                 |                        |
| Concurrent meds                                   | X                      | X <sup>d</sup>                                                                                                                                                                                    | X                 | X                 | X                               |                                 |                                 | X                      |
| Physical exam                                     | X                      | X <sup>d</sup>                                                                                                                                                                                    | X                 | X                 | X                               |                                 |                                 | X                      |
| Vital signs (pulse, blood pressure)               | X                      | X <sup>d</sup>                                                                                                                                                                                    | X                 | X                 | X                               |                                 |                                 | X                      |
| Weight                                            | X                      | X <sup>d</sup>                                                                                                                                                                                    | X                 | X                 | X                               |                                 |                                 | X                      |
| Adverse event evaluation                          | X                      | X <sup>d</sup>                                                                                                                                                                                    | X                 | X                 | X                               |                                 |                                 | X                      |
| CBC w/diff, plts                                  | X                      | X <sup>e</sup>                                                                                                                                                                                    | X                 | X                 | X                               | X                               | X                               | X                      |
| Comprehensive panel <sup>c</sup>                  | X                      | X <sup>e</sup>                                                                                                                                                                                    | X                 | X                 | X                               | X                               | X                               | X                      |
| TSH                                               | X                      |                                                                                                                                                                                                   |                   |                   | X                               |                                 |                                 | X                      |
| Beta-HCG (serum or urine)                         | X <sup>i</sup>         |                                                                                                                                                                                                   |                   |                   |                                 |                                 |                                 |                        |
| Request for archival tumor tissue                 | X                      |                                                                                                                                                                                                   |                   |                   |                                 |                                 |                                 |                        |
| Research blood draw                               | X                      |                                                                                                                                                                                                   |                   |                   |                                 |                                 |                                 |                        |
| Research tumor biopsies <sup>k</sup>              | X <sup>k</sup>         | X <sup>k</sup>                                                                                                                                                                                    |                   |                   |                                 |                                 |                                 |                        |
| Research peripheral blood collection <sup>l</sup> |                        | X                                                                                                                                                                                                 |                   |                   | X                               |                                 |                                 | X                      |
| Tumor measurements <sup>h</sup>                   | X                      | CT and/or MRI will be performed every 12 weeks (+/- 1 week) (or approximately every 2 cycles). Objective responses should be confirmed with a second assessment performed at least 4 weeks later. |                   |                   |                                 |                                 |                                 |                        |

a: See Section 8.0 for the timing of these tests/evaluations prior to the start of therapy.

b: Study drugs will be administered at the following doses/schedules: nivolumab 3 mg/kg IV every 2 weeks and ipilimumab 1 mg/kg IV every 6 weeks. At the investigator's discretion patients can be treated with nivolumab alone after 4 cycles for safety concerns.

c: Albumin, alkaline phosphatase, total bilirubin, bicarbonate, BUN, calcium, chloride, creatinine, glucose, potassium, total protein, SGOT [AST], SGPT [ALT], sodium.

d: These Week 1 evaluations may be performed within 3 days prior to the start of treatment.

e: These Week 1 laboratory tests may be done up to 7 days prior to starting treatment. It is unnecessary to repeat these laboratory tests if the screening assessments of the same tests were performed within 7 days prior to the first dose of therapy.

f: These columns reflect the schedule of assessments/treatment required for Cycle 2 and subsequent cycles in the weeks designated.

g: Off-study evaluation will be performed within 30 days of the patient's last dose of study drug (Exception: Patients for whom removal from the study followed a prolonged interval during which administration of study drugs was held for greater than 30 days, the off-study evaluation needs to be performed within 30 days of the patient's last physical assessment by investigator physician).

h: The treating physician may reschedule radiology scans due to treatment delays at his or her discretion. If the patient has CT and/or MRI scans completed early for any reason (e.g. suspicion of disease progression), the next set of scans may be ordered in 12 weeks (+/- 1 week) from that assessment. Please see Section 13.0 regarding the altered schedule of radiographic assessments required for patients being treated beyond initial evidence of tumor progression.

i. Serum or urine pregnancy test is required within 14 days of drug treatment for all women of child-bearing potential.

j: Peripheral blood samples will be collected in 4 CPT tubes (BD, 8-ml capacity, total blood volume collected~32 ml for PBMC purification for flow cytometric analysis) and 1 PAXgene tube (BD order #762165 or equivalent) (for purification of RNA/DNA for TCR analysis). The Cycle 1, Week 1 sample should be obtained prior to drug administration, but not beyond 3 days prior to the start of treatment. Subsequent samples will be obtained on Cycle 2/Week 1, Cycle 3/Week 1, and then Off Study. If the collection of all 4 CPT tubes and 1 PAXgene tube are not feasible, this will not be considered a protocol deviation.

k. The first of two research biopsies will be performed anytime prior to Week 1 Day 1. Tumor tissue obtained prior to study consent or treatment as part of standard of care can also be submitted in lieu of performance of the first pre-treatment biopsy, if the Principal Investigator deems it to be of sufficient quantity/quality/timeliness. The second research biopsy will be performed prior to the administration of the second dose of ipilimumab. Exceptions regarding the timing of the second biopsy can be made at the Principal Investigator's discretion, and will not be considered a violation. Patients may be exempt from biopsy if 1) the

investigator or person performing the biopsy judges that no tumor is accessible for biopsy, 2) the investigator or person performing the biopsy feels that the biopsy poses too great of a risk to the patient, or 3) the patient's platelet count is <100,000/mcl or he/she cannot be safely removed from anti-coagulation therapy (if the anti-coagulation therapy needs to be temporarily held for the biopsy procedure). Radiologic guidance (CT, MRI or ultrasound guided) approaches and obtaining multiple cores to ensure sufficient biopsy material (at least 3 cores preferred) are allowed as long as it is considered safe for the patient. If the only tumor accessible for biopsy is also the only lesion that can be used for RECIST v1.1 response evaluation, then the patient may be exempt from biopsy. If the investigator deems a second research biopsy to be high risk after a patient has completed the first research biopsy, the patient may also be exempt from the second biopsy.

- I. If Cycle 1 Week 1 labs fall below screening requirements, the patient can start treatment at the discretion of the treating investigator if safety is not compromised.



## 11.0 TOXICITIES/SIDE EFFECTS

There will be no dose modifications permitted. Dose reductions or dose escalations are not permitted.

### ***Management Algorithms for Immuno-Oncology Agents***

Immuno-oncology (I-O) agents are associated with adverse events (AEs) that can differ in severity and duration than adverse events caused by other therapeutic classes. Nivolumab and ipilimumab are considered immuno-oncology agents in this protocol. Management algorithms have been developed to assist investigators in assessing and managing the following groups of adverse events: Gastrointestinal, Renal, Pulmonary, Hepatic, Endocrinopathies, Skin, and Neurological (see Appendix 3; these are guidelines, not required interventions).

Early recognition and intervention are recommended according to the management algorithms; and in addition include ophthalmologic evaluations for any visual symptoms in order to evaluate for nivolumab or ipilimumab related uveitis.

The recommendations are to follow the algorithms in the nivolumab investigator brochure for immune related events; while the ipilimumab investigator brochure contains similar algorithms, the algorithms in the nivolumab brochure have been aligned to accommodate combinations as well as nivolumab monotherapy. (see also Appendix 3; IB algorithms and Appendix 3 instructions are guidelines, not required interventions).

Therefore, the algorithms recommended for utilization are included here for reference. Additional details on the safety of nivolumab and ipilimumab, including results from clinical studies, are available in the IB.

### **Dose Delay Criteria**

**Because of the potential for clinically meaningful nivolumab-related AEs requiring early recognition and prompt intervention, management algorithms have been developed for suspected AEs of selected categories.**

Dose delay criteria, treatment resumption criteria, drug discontinuation criteria, and management algorithms described in this section and Appendix 3 are applicable for drug-related adverse events (adverse events that are possibly, probably, or definitely related to nivolumab, ipilimumab, or both). All study drugs must be delayed until treatment can resume.

Nivolumab and ipilimumab administration should be delayed for the following:

- Any Grade  $\geq 2$  non-skin, drug-related adverse event with the exception of fatigue, medically managed hypothyroidism or hyperthyroidism, tolerable Grade 2 AEs (except for grade 2 uveitis discussed below), and Grade 2 laboratory abnormalities other than Grade 2 creatinine, AST, ALT, and/or total bilirubin abnormalities
- Grade 2 drug-related creatinine, AST, ALT, and/or total bilirubin abnormalities.
- Any Grade 3 skin, drug-related adverse event
- Any Grade 3 drug-related laboratory abnormality, with the following exceptions:
  - Grade 3 or 4 lymphopenia or asymptomatic amylase or lipase abnormalities do not require a dose delay

- Grade  $\geq$  3 AST, ALT, total bilirubin will require dose discontinuation
- Any adverse event, laboratory abnormality, or intercurrent illness which, in the judgment of the investigator, warrants delaying the dose of study medication.

### **Criteria to Resume Treatment**

Subjects may resume treatment with study drug when the drug-related AE(s) resolve to Grade  $\leq$ 1 or baseline value, with the following exceptions:

- Subjects may resume treatment in the presence of Grade 2 fatigue
- Subjects who have not experienced a Grade 3 drug-related skin AE may resume treatment in the presence of Grade 2 skin toxicity
- Subjects with Grade 2 AST, ALT, and/or total bilirubin abnormalities may resume treatment when laboratory values return to baseline and management with corticosteroids, if needed, is complete
- Subjects with combined Grade 2 AST/ALT AND total bilirubin values meeting discontinuation parameters (below) should have treatment permanently discontinued
- Drug-related pulmonary toxicity, diarrhea, or colitis, must have resolved to baseline before treatment is resumed. Subjects with persistent Grade 1 pneumonitis after completion of a steroid taper over at least 1 month may be eligible for retreatment if discussed with the Principal Investigator.
- Drug-related endocrinopathies adequately controlled with only physiologic hormone replacement may resume treatment. Adrenal insufficiency requires discontinuation regardless of control with hormone replacement.

If the criteria to resume treatment is met, scheduling of subsequent will be determined by treating investigator and PI.

Continuing treatment with both ipilimumab and nivolumab is preferred. However, resumption of therapy with just one drug (either nivolumab or ipilimumab) may be considered if 1) the investigator makes the judgement that proceeding with only one drug is necessary to possibly avoid recurrence of an adverse event that would require further dose delay, and 2) it is discussed with the Principal Investigator.

If treatment is delayed > 6 weeks, the subject must be permanently discontinued from study therapy, except as specified in discontinuation section.

### **Discontinuation Criteria**

Treatment should be permanently discontinued for the following:

- Any Grade 2 drug-related uveitis, eye pain or blurred vision that does not respond to topical therapy and does not improve to Grade 1 severity within the re-treatment period OR requires systemic treatment
- Any Grade 3 non-skin, drug-related adverse event lasting > 7 days with the following exceptions for laboratory abnormalities, diarrhea, colitis, neurologic toxicity, drug-related

uveitis, pneumonitis, bronchospasm, hypersensitivity reactions, infusion reactions, and endocrinopathies:

- Grade 3 drug-related diarrhea, colitis, neurologic toxicity, uveitis, pneumonitis, bronchospasm, hypersensitivity reaction, or infusion reaction of any duration requires discontinuation
- Grade 3 drug-related endocrinopathies, adequately controlled with only physiologic hormone replacement do not require discontinuation. Adrenal insufficiency requires discontinuation regardless of control with hormone replacement.
- Grade 3 drug-related laboratory abnormalities do not require treatment discontinuation except:
  - Grade 3 drug-related thrombocytopenia > 7 days or associated with bleeding requires discontinuation
  - Any drug-related liver function test (LFT) abnormality that meets the following criteria require discontinuation:
    - o Grade  $\geq$  3 drug-related AST, ALT or Total Bilirubin requires discontinuation\*
    - o Concurrent AST or ALT > 3 x ULN and total bilirubin > 2x ULN

\*In most cases of Grade 3 AST or ALT elevation, study drug(s) will be permanently discontinued. If the investigator determines a possible favorable benefit/risk ratio that warrants continuation of study drug(s), a discussion between the investigator and the BMS Medical Monitor/designee must occur.

- Any Grade 4 drug-related adverse event or laboratory abnormality (including but not limited to creatinine, AST, ALT, or Total Bilirubin), except for the following events which do not require discontinuation:
  - Grade 4 neutropenia  $\leq$  7 days
  - Grade 4 lymphopenia or leukopenia or asymptomatic amylase or lipase
  - Isolated Grade 4 electrolyte imbalances/abnormalities that are not associated with clinical sequelae and are corrected with supplementation/appropriate management within 72 hours of their onset
  - Grade 4 drug-related endocrinopathy adverse events, such as, hyper- or hypothyroidism, or glucose intolerance, which resolve or are adequately controlled with physiologic hormone replacement (corticosteroids, thyroid hormones) or glucose-controlling agents, respectively, may not require discontinuation after discussion with and approval from the Principal Investigator
- Any event that leads to delay in dosing lasting > 6 weeks from the previous dose requires discontinuation, with the following exceptions:
  - Dosing delays to allow for prolonged steroid tapers to manage drug-related adverse events are allowed.
  - Dosing delays lasting > 6 weeks from the previous dose that occur for non-drug-related reasons may be allowed if approved by the Principal Investigator.

Prior to re-initiating treatment in a participant with a dosing delay lasting > 6 weeks, the Principal Investigator must be consulted. Tumor assessments should continue as per protocol even if dosing is delayed. Periodic study visits to assess safety and laboratory studies should also continue every 6 weeks or more frequently if clinically indicated during such dosing delays.

- Any adverse event, laboratory abnormality, or intercurrent illness which, in the judgment of the Investigator, presents a substantial clinical risk to the subject with continued nivolumab or ipilimumab dosing

### **Treatment of Nivolumab or Ipilimumab Related Infusion Reactions**

Since nivolumab and ipilimumab contain only human immunoglobulin protein sequences, it is unlikely to be immunogenic and induce infusion or hypersensitivity reactions. However, if such a reaction were to occur, it might manifest with fever, chills, rigors, headache, rash, pruritus, arthralgias, hypo- or hypertension, bronchospasm, or other symptoms.

All Grade 3 or 4 infusion reactions should be reported as an SAE if criteria are met. Infusion reactions should be graded according to NCI CTCAE 4.0 guidelines.

Treatment recommendations are provided below and may be modified based on local treatment standards and guidelines as appropriate:

**For Grade 1 symptoms:** (Mild reaction; infusion interruption not indicated; intervention not indicated)

Remain at bedside and monitor subject until recovery from symptoms. The following prophylactic premedications are recommended for future infusions: diphenhydramine 50 mg (or equivalent) and/or paracetamol 325 to 1000 mg (acetaminophen) at least 30 minutes before additional nivolumab administrations.

**For Grade 2 symptoms:** (Moderate reaction requires therapy or infusion interruption but responds promptly to symptomatic treatment [eg, antihistamines, non-steroidal anti inflammatory drugs, narcotics, corticosteroids, bronchodilators, IV fluids]; prophylactic medications indicated for 24 hours).

Stop the nivolumab or ipilimumab infusion, begin an IV infusion of normal saline, and treat the subject with diphenhydramine 50 mg IV (or equivalent) and/or paracetamol 325 to 1000 mg (acetaminophen); remain at bedside and monitor subject until resolution of symptoms. Corticosteroid or bronchodilator therapy may also be administered as appropriate. If the infusion is interrupted, then restart the infusion at 50% of the original infusion rate when symptoms resolve; if no further complications ensue after 30 minutes, the rate may be increased to 100% of the original infusion rate. Monitor subject closely. If symptoms recur then no further nivolumab or ipilimumab will be administered at that visit. Administer diphenhydramine 50 mg IV, and remain at bedside and monitor the subject until resolution of symptoms. The amount of study drug infused must be recorded on the electronic case report form (eCRF). The following prophylactic premedications are recommended for future infusions: diphenhydramine 50 mg (or equivalent) and/or paracetamol 325 to 1000 mg (acetaminophen) should be administered at least 30 minutes before additional nivolumab or ipilimumab administrations. If necessary, corticosteroids (recommended dose: up to 25 mg of IV hydrocortisone or equivalent) may be used.

**For Grade 3 or Grade 4 symptoms:** (Severe reaction, Grade 3: prolonged [ie, not rapidly responsive to symptomatic medication and/or brief interruption of infusion]; recurrence of symptoms following initial improvement; hospitalization indicated for other clinical sequelae [eg, renal impairment, pulmonary infiltrates]). Grade 4: (life threatening; pressor or ventilatory support indicated).

Immediately discontinue infusion of nivolumab or ipilimumab. Begin an IV infusion of normal saline, and treat the subject as follows. Recommend bronchodilators, epinephrine 0.2 to 1 mg of a 1:1,000

solution for subcutaneous administration or 0.1 to 0.25 mg of a 1:10,000 solution injected slowly for IV administration, and/or diphenhydramine 50 mg IV with methylprednisolone 100 mg IV (or equivalent), as needed. Subject should be monitored until the investigator is comfortable that the symptoms will not recur. Nivolumab or ipilimumab will be permanently discontinued. Investigators should follow their institutional guidelines for the treatment of anaphylaxis. Remain at bedside and monitor subject until recovery from symptoms. In the case of late-occurring hypersensitivity symptoms (eg, appearance of a localized or generalized pruritus within 1 week after treatment), symptomatic treatment may be given (eg, oral antihistamine, or corticosteroids).

## 12.0 CRITERIA FOR THERAPEUTIC RESPONSE/OUTCOME ASSESSMENT

Please refer to Section 10 regarding the timing of tumor measurement assessments.

Response and progression will be evaluated in this study using the new international criteria proposed by the revised Response Evaluation Criteria in Solid Tumors (RECIST) guideline (version 1.1) [*Eur J Ca* 45:228-247, 2009]. Changes in the largest diameter (uni dimensional measurement) of the tumor lesions and the shortest diameter in the case of malignant lymph nodes are used in the RECIST criteria.

### 12.1 Definitions

Evaluable for toxicity. All patients will be evaluable for toxicity from the time of their first treatment with nivolumab and ipilimumab.

Evaluable for objective response. Only those patients who have measurable disease present at baseline and have received at least one dose of therapy will be considered evaluable for response. These patients will have their response classified according to the definitions stated below. (Note: Patients who exhibit objective disease progression prior to the end of cycle 1 will also be considered evaluable.)

Evaluable Non-Target Disease Response. Patients who have lesions present at baseline that are evaluable but do not meet the definitions of measurable disease, have received at least one cycle of therapy, and have had their disease re-evaluated will be considered evaluable for non-target disease. The response assessment is based on the presence, absence, or unequivocal progression of the lesions.

### 12.2 Disease Parameters

Measurable disease. Measurable lesions are defined as those that can be accurately measured in at least one dimension (longest diameter to be recorded) as  $\geq 20$  mm by chest x-ray, as  $\geq 10$  mm with CT scan, or  $\geq 10$  mm with calipers by clinical exam. All tumor measurements must be recorded in millimeters (or decimal fractions of centimeters).

Note: Tumor lesions that are situated in a previously irradiated area are not considered measurable unless there has been demonstrated progression in the lesion.

Malignant lymph nodes. To be considered pathologically enlarged and measurable, a lymph node must be  $\geq 15$  mm in short axis when assessed by CT scan (CT scan slice thickness recommended to be no greater than 5 mm). At baseline and in follow-up, only the short axis will be measured and followed.

Non-measurable disease. All other lesions (or sites of disease), including small lesions (longest diameter  $< 10$  mm or pathological lymph nodes with  $\geq 10$  to  $< 15$  mm short axis), are considered non-measurable disease. Bone lesions, leptomeningeal disease, ascites, pleural/pericardial effusions, lymphangitis cutis/pulmonitis, inflammatory breast disease, and abdominal masses (not followed by CT or MRI), are considered as non-measurable.

Note: Cystic lesions that meet the criteria for radiographically defined simple cysts should not be considered as malignant lesions (neither measurable nor non-measurable) since they are, by definition, simple cysts.

'Cystic lesions' thought to represent cystic metastases can be considered as measurable lesions, if they meet the definition of measurability described above. However, if non-cystic lesions are present in the same patient, these are preferred for selection as target lesions.

Target lesions. All measurable lesions up to a maximum of 2 lesions per organ and 5 lesions in total, representative of all involved organs, should be identified as **target lesions** and recorded and measured at baseline. Target lesions should be selected on the basis of their size (lesions with the longest diameter), be representative of all involved organs, but in addition should be those that lend themselves to reproducible repeated measurements. It may be the case that, on occasion, the largest lesion does not lend itself to reproducible measurement in which circumstance the next largest lesion which can be measured reproducibly should be selected. A sum of the diameters (longest for non-nodal lesions, short axis for nodal lesions) for all target lesions will be calculated and reported as the baseline sum diameters. If lymph nodes are to be included in the sum, then only the short axis is added into the sum. The baseline sum diameters will be used as reference to further characterize any objective tumor regression in the measurable dimension of the disease.

Non-target lesions. All other lesions (or sites of disease) including any measurable lesions over and above the 5 target lesions should be identified as **non-target lesions** and should also be recorded at baseline. Measurements of these lesions are not required, but the presence, absence, or in rare cases unequivocal progression of each should be noted throughout follow-up.

### 12.3 Methods for Evaluation of Measurable Disease

All measurements should be taken and recorded in metric notation using a ruler or calipers. All baseline evaluations should be performed as closely as possible to the

beginning of treatment and never more than 4 weeks before the beginning of the treatment.

The same method of assessment and the same technique should be used to characterize each identified and reported lesion at baseline and during follow-up. Imaging-based evaluation is preferred to evaluation by clinical examination unless the lesion(s) being followed cannot be imaged but are assessable by clinical exam.

Clinical lesions: Clinical lesions will only be considered measurable when they are superficial (e.g., skin nodules and palpable lymph nodes) and  $\geq 10$  mm diameter as assessed using calipers (e.g., skin nodules). In the case of skin lesions, documentation by color photography, including a ruler to estimate the size of the lesion, is recommended.

Chest x-ray: Lesions on chest x-ray are acceptable as measurable lesions when they are clearly defined and surrounded by aerated lung. However, CT is preferable.

Conventional CT and MRI This guideline has defined measurability of lesions on CT scan based on the assumption that CT slice thickness is 5 mm or less. If CT scans have slice thickness greater than 5 mm, the minimum size for a measurable lesion should be twice the slice thickness. MRI is also acceptable in certain situations (e.g. for body scans).

Use of MRI remains a complex issue. MRI has excellent contrast, spatial, and temporal resolution; however, there are many image acquisition variables involved in MRI, which greatly impact image quality, lesion conspicuity, and measurement. Furthermore, the availability of MRI is variable globally. As with CT, if an MRI is performed, the technical specifications of the scanning sequences used should be optimized for the evaluation of the type and site of disease. Furthermore, as with CT, the modality used at follow-up should be the same as was used at baseline and the lesions should be measured/assessed on the same pulse sequence. It is beyond the scope of the RECIST guidelines to prescribe specific MRI pulse sequence parameters for all scanners, body parts, and diseases. Ideally, the same type of scanner should be used and the image acquisition protocol should be followed as closely as possible to prior scans. Body scans should be performed with breath-hold scanning techniques, if possible.

Ultrasound Ultrasound is not useful in assessment of lesion size and should not be used as a method of measurement. Ultrasound examinations cannot be reproduced in their entirety for independent review at a later date and, because they are operator dependent, it cannot be guaranteed that the same technique and measurements will be taken from one assessment to the next. If new lesions are identified by ultrasound in the course of the study, confirmation by CT or MRI is advised. If there is concern about radiation exposure at CT, MRI may be used instead of CT in selected instances.

Endoscopy, Laparoscopy The utilization of these techniques for objective tumor evaluation is not advised. However, such techniques may be useful to confirm complete pathological response when biopsies are obtained or to determine relapse in trials where recurrence following complete response (CR) or surgical resection is an endpoint.

Tumor markers Tumor markers alone cannot be used to assess response. If markers are initially above the upper normal limit, they must normalize for a patient to be considered in complete clinical response. Specific guidelines for both CA-125 response (in recurrent ovarian cancer) and PSA response (in recurrent prostate cancer) have been published [*JNCI* 96:487-488, 2004; *J Clin Oncol* 17, 3461-3467, 1999; *J Clin Oncol* 26:1148-1159, 2008]. In addition, the Gynecologic Cancer Intergroup has developed CA-125 progression criteria which are to be integrated with objective tumor assessment for use in first-line trials in ovarian cancer [*JNCI* 92:1534-1535, 2000].

Cytology, Histology These techniques can be used to differentiate between partial responses (PR) and complete responses (CR) in rare cases (e.g., residual lesions in tumor types, such as germ cell tumors, where known residual benign tumors can remain).

The cytological confirmation of the neoplastic origin of any effusion that appears or worsens during treatment when the measurable tumor has met criteria for response or stable disease is mandatory to differentiate between response or stable disease (an effusion may be a side effect of the treatment) and progressive disease.

## 12.4 Response Criteria

### 12.4.1 Evaluation of Target Lesions

- Complete Response (CR): Disappearance of all target lesions. Any pathological lymph nodes (whether target or non-target) must have reduction in short axis to <10 mm.
- Partial Response (PR): At least a 30% decrease in the sum of the diameters of target lesions, taking as reference the baseline sum diameters.
- Progressive Disease (PD): At least a 20% increase in the sum of the diameters of target lesions, taking as reference the smallest sum on study (this includes the baseline sum if that is the smallest on study). In addition to the relative increase of 20%, the sum must also demonstrate an absolute increase of at least 5 mm. (Note: the



appearance of one or more new lesions is also considered progressions).

Stable Disease (SD): Neither sufficient shrinkage to qualify for PR nor sufficient increase to qualify for PD, taking as reference the smallest sum diameters while on study.

#### 12.4.2 Evaluation of Non-Target Lesions

Complete Response (CR): Disappearance of all non-target lesions and normalization of tumor marker level. All lymph nodes must be non-pathological in size (<10 mm short axis). Note: If tumor markers are initially above the upper normal limit, they must normalize for a patient to be considered in complete clinical response.

Non-CR/Non-PD: Persistence of one or more non-target lesion(s) and/or maintenance of tumor marker level above the normal limits.

Progressive Disease (PD): Appearance of one or more new lesions and/or *unequivocal progression* of existing non-target lesions. *Unequivocal progression* should not normally trump target lesion status. It must be representative of overall disease status change, not a single lesion increase.

Although a clear progression of “non-target” lesions only is exceptional, the opinion of the treating physician should prevail in such circumstances, and the progression status should be confirmed at a later time by the review panel (or Principal Investigator).

#### 12.4.3 Evaluation of Best Overall Response

The best overall response is the best response recorded from the start of the treatment until disease progression/recurrence (taking as reference for progressive disease the smallest measurements recorded since the treatment started). The patient's best response assignment will depend on the achievement of both measurement and confirmation criteria.

#### **For Patients with Measurable Disease (i.e., Target Disease)**

| Target Lesions | Non-Target Lesions | New Lesions | Overall Response | Best Overall Response when Confirmation is Required* |
|----------------|--------------------|-------------|------------------|------------------------------------------------------|
| CR             | CR                 | No          | CR               | ≥4 wks. Confirmation**                               |

|                                                                                                                                                                                                                                                                                                                                                                                                                                                                                                                                                                                                                                                             |                             |           |    |                                                  |
|-------------------------------------------------------------------------------------------------------------------------------------------------------------------------------------------------------------------------------------------------------------------------------------------------------------------------------------------------------------------------------------------------------------------------------------------------------------------------------------------------------------------------------------------------------------------------------------------------------------------------------------------------------------|-----------------------------|-----------|----|--------------------------------------------------|
| CR                                                                                                                                                                                                                                                                                                                                                                                                                                                                                                                                                                                                                                                          | Non-CR/Non-PD               | No        | PR | ≥4 wks. Confirmation**                           |
| CR                                                                                                                                                                                                                                                                                                                                                                                                                                                                                                                                                                                                                                                          | Not evaluated               | No        | PR |                                                  |
| PR                                                                                                                                                                                                                                                                                                                                                                                                                                                                                                                                                                                                                                                          | Non-CR/Non-PD/not evaluated | No        | PR |                                                  |
| SD                                                                                                                                                                                                                                                                                                                                                                                                                                                                                                                                                                                                                                                          | Non-CR/Non-PD/not evaluated | No        | SD | Documented at least once ≥4 wks. from baseline** |
| PD                                                                                                                                                                                                                                                                                                                                                                                                                                                                                                                                                                                                                                                          | Any                         | Yes or No | PD | no prior SD, PR or CR                            |
| Any                                                                                                                                                                                                                                                                                                                                                                                                                                                                                                                                                                                                                                                         | PD***                       | Yes or No | PD |                                                  |
| Any                                                                                                                                                                                                                                                                                                                                                                                                                                                                                                                                                                                                                                                         | Any                         | Yes       | PD |                                                  |
| <p>* See RECIST 1.1 manuscript for further details on what is evidence of a new lesion.</p> <p>** Only for non-randomized trials with response as primary endpoint.</p> <p>*** In exceptional circumstances, unequivocal progression in non-target lesions may be accepted as disease progression.</p> <p><u>Note:</u> Patients with a global deterioration of health status requiring discontinuation of treatment without objective evidence of disease progression at that time should be reported as “<i>symptomatic deterioration.</i>” Every effort should be made to document the objective progression even after discontinuation of treatment.</p> |                             |           |    |                                                  |

**For Patients with Non-Measurable Disease (i.e., Non-Target Disease)**

| Non-Target Lesions                                                                                                                                                                                                                                  | New Lesions | Overall Response |
|-----------------------------------------------------------------------------------------------------------------------------------------------------------------------------------------------------------------------------------------------------|-------------|------------------|
| CR                                                                                                                                                                                                                                                  | No          | CR               |
| Non-CR/non-PD                                                                                                                                                                                                                                       | No          | Non-CR/non-PD*   |
| Not all evaluated                                                                                                                                                                                                                                   | No          | not evaluated    |
| Unequivocal PD                                                                                                                                                                                                                                      | Yes or No   | PD               |
| Any                                                                                                                                                                                                                                                 | Yes         | PD               |
| <p>* 'Non-CR/non-PD' is preferred over 'stable disease' for non-target disease since SD is increasingly used as an endpoint for assessment of efficacy in some trials so to assign this category when no lesions can be measured is not advised</p> |             |                  |

**12.4.4 Duration of Response**

Duration of overall response: The duration of overall response is measured from the time measurement criteria are met for CR or PR (whichever is first recorded) until the

first date that recurrent or progressive disease is objectively documented (taking as reference for progressive disease the smallest measurements recorded since the treatment started).

The duration of overall CR is measured from the time measurement criteria are first met for CR until the first date that progressive disease is objectively documented.

Duration of stable disease: Stable disease is measured from the start of the treatment until the criteria for progression are met, taking as reference the smallest measurements recorded since the treatment started, including the baseline measurements.

Treatment beyond progression: Subjects who continue treatment beyond initial investigator-assessed, RECIST 1.1-defined progression will be considered to have investigator-assessed progressive disease at the time of the initial progression event.

### **13.0 CRITERIA FOR REMOVAL FROM STUDY**

- Disease progression on treatment with nivolumab and ipilimumab.
- Patients may be removed from the study for protocol non-compliance.
- If at any time the patient develops unacceptable toxicity he/she will be removed from study.
- A patient can be removed from the trial if a dose delay of > 6 weeks occurs, unless the PI deems it appropriate to keep the patient on the trial as per protocol guidelines (see Section 11).
- Participants can be removed from the study at any time if the study doctor feels that it is in their best interest to do so.
- Patients may withdraw consent from the study at any time.

#### **Treatment Beyond Progression**

Accumulating evidence indicates a minority of subjects treated with immunotherapy may derive clinical benefit despite initial evidence of PD.

Subjects will be permitted to continue treatment beyond initial RECIST 1.1 defined PD as long as they meet the following criteria:

- Investigator-assessment that continued protocol therapy could elicit future clinical benefit and the subject is tolerating study treatment.

The assessment of clinical benefit should take into account whether the subject is clinically deteriorating and unlikely to receive further benefit from continued treatment.

Followup imaging to evaluate for further progression will be performed 4-8 weeks after the initial scan demonstrating disease progression. Subsequent scans may be performed every 8 weeks (+/- 1 week) or every 12 weeks (+/- 1 week) per the investigator's discretion. Subjects should discontinue study therapy upon evidence of further progression, defined as an additional 10% or greater increase in tumor burden volume from time of initial progression (including all target lesions and new measurable lesions).

New lesions are considered measurable at the time of initial progression if the longest diameter is at least 10 mm (except for pathological lymph nodes, which must have a short axis of at least 15 mm) and was not present during baseline scan. Any new lesion considered non-measurable at the time of initial progression may become measurable and therefore included in the tumor burden measurement if the longest diameter increases to at least 10 mm (except for pathological lymph nodes, which must have an increase in short axis to at least 15 mm).

## 14.0 BIOSTATISTICS

The primary endpoint of the study for each cohort is best overall response rate (BOR; CR+PR by RECIST v1.1). The ACC (Cohort 1) and non-ACC cohorts (Cohort 2) will be assessed separately. For ACC, our recent literature review of all systemic chemotherapy studies reported for R/M ACC patients from 1966 to 2009 revealed that these were generally small studies of variable, poor methodological quality from which definitive conclusions regarding the efficacy of chemotherapy are impossible to establish<sup>3</sup>. Objective responses with cytotoxic chemotherapy were infrequent, and in 10 studies evaluating different targeted agents (imatinib, gefitinib, cetuximab, lapatinib, bortezomib (excluding the VEGF targeted TKIs)) involving 157 ACC patients, only 2 objective responses were reported (in response to high dose imatinib). Notably, there is no data addressing potential efficacy of systemic therapy beyond the first line setting in R/M ACC<sup>3</sup>. The same concerns regarding trial design and modest activity with chemotherapy apply to non-ACC histologies as well<sup>4</sup>. There currently is no standard therapy for SGCs. Therefore, we will adopt a BOR of 5% as the null hypothesis and a BOR of 20% as desirable. A minimax two-stage design will be used for each cohort. In order to detect a difference between an unacceptable ORR of 5% and a desirable ORR of 20% with a one-sided type I error of 10% and power of 90%, at least 1 response needs to be observed among the first 18 patients enrolled in the first stage. If this is achieved, then the study will progress to the second stage in which an additional 14 patients will be accrued. In order to move to the second stage of the study, the patient response in the first stage must occur within 6 cycles (or 36 weeks (+/- 2 weeks)) of drug treatment. At the end of the trial, at least 4 responses need to be observed among a total of 32 patients of the cohort to be considered worthy of further investigation. Maximum number of patients treated in both cohorts combined would be 64 patients.

Given the length of the observation period for response, if the decision on whether to proceed to the second stage cannot be made after the first 18 patients have been enrolled, the study will not halt and patients will continue to be enrolled. In the worst case scenario, all 32 patients will have been enrolled before the decision on whether to proceed to the second

stage can be made. In this case the study becomes a single-stage design in effect, which has the same type-I error rate, power, and rejection criterion for the null hypothesis as the original minimax two-stage design.

Patients who receive at least one dose of either study medication (nivolumab or ipilimumab) will be included in the evaluation of the primary objective. Patients who are enrolled, but withdraw consent or are removed from the study prior to obtaining the first response assessment while on study treatment can be replaced, except for those who were taken off study for progression of disease or toxicity (in these specific incidences, patients will be classified as non-responders).

Secondary endpoints will include measuring progression-free survival (PFS) with recurrent/metastatic SGC treated with nivolumab and ipilimumab, and assessing the safety/tolerability of the regimen.

PFS will be estimated using Kaplan-Meier methodology, with time origin at the start of the treatment. Patients will be followed until progression of disease or death related to disease, whichever come first. Patients removed from the study for reasons unrelated to the disease (e.g. moving, accidental death) will be counted as censored. Patients who continue treatment beyond initial investigator-assessed, RECIST 1.1-defined progression, and are subsequently removed from study within the next radiographic assessment for progression, will be considered to have investigator-assessed progressive disease at the time of the initial progression event.

Safety will be assessed in terms of AEs, laboratory data and vital sign data, which will be collected for all patients. Appropriate summaries of these data will be presented. AEs will be listed individually per patient according to CTCAE version 4.0, and the number of patients experiencing each AE will be summarized. The safety population will comprise all patients who receive at least one dose of study treatment.

Due to the limited sample size, the analyses investigating the association between correlative markers and BOR will be exploratory. These exploratory analyses will be evaluated within each cohort separately. Categorical markers will be correlated with BOR by Fisher's exact tests. Continuous markers will be correlated with BOR by logistic regression. Immune activation that occurs concomitant with experimental therapy will be serially assessed in the PBMC analysis performed for each patient. Specifically, the changes in T cell subsets that occur with therapy will be analyzed and interpreted as potential indicators of immune activation induced by drug therapy. Proportions of T cell subsets will be calculated with 95% confidence intervals at each time point and plotted over time to reveal any trend. The baseline proportions of T cell subset and changes in these proportions from baseline to last time point will be correlated with the response status univariately.

## **15.0 RESEARCH PARTICIPANT REGISTRATION AND RANDOMIZATION PROCEDURES**

## **15.1 Research Participant Registration**

Confirm eligibility as defined in the section entitled Inclusion/Exclusion Criteria. Obtain informed consent, by following procedures defined in section entitled Informed Consent Procedures. During the registration process registering individuals will be required to complete a protocol specific Eligibility Checklist. The individual signing the Eligibility Checklist is confirming whether or not the participant is eligible to enroll in the study. Study staff are responsible for ensuring that all institutional requirements necessary to enroll a participant to the study have been completed. See related Clinical Research Policy and Procedure #401 (Protocol Participant Registration).

## **15.2 Randomization**

Not applicable.

## **16.0 DATA MANAGEMENT ISSUES**

A Research Study Assistant (RSA) will be assigned to the study. The responsibilities of the RSA include project compliance, data collection, abstraction and entry, data reporting, regulatory monitoring, problem resolution and prioritization, and coordinating the activities of the protocol study team.

The data collected for this study will be entered into the secure Clinical Research Database (CRDB). Source documentation will be available to support the computerized patient record.

Whole exome or genome sequencing data (if collected) will be deidentified; samples will be labelled with patient study IDs to preserve links to clinical data. The deidentified genomic data will be stored to a protected server that is specifically set aside for clinical trial data.

### **16.1 Quality Assurance**

Weekly registration reports will be generated to monitor patient accruals and completeness of registration data. Routine data quality reports will be generated to assess missing data and inconsistencies. Accrual rates and extent and accuracy of evaluations and follow-up will be monitored periodically throughout the study period and potential problems will be brought to the attention of the study team for discussion and action.

### **16.2 Data and Safety Monitoring**

The Data and Safety Monitoring (DSM) Plans at Memorial Sloan-Kettering Cancer Center were approved by the National Cancer Institute in September 2001. The plans address the new policies set forth by the NCI in the document entitled "Policy of the National Cancer Institute for Data and Safety Monitoring of Clinical Trials" which can be found at: <http://www.cancer.gov/clinicaltrials/conducting/dsm-guidelines/page1>.

The DSM Plans at MSKCC were established and are monitored by the Office of Clinical Research. The MSKCC Data and Safety Monitoring Plans can be found on the MSKCC Intranet at:

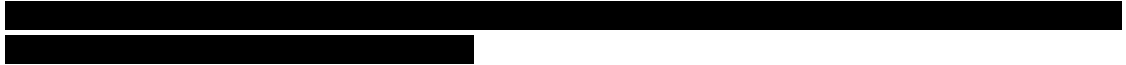

There are several different mechanisms by which clinical trials are monitored for data, safety and quality. There are institutional processes in place for quality assurance (e.g., protocol monitoring, compliance and data verification audits, therapeutic response, and staff education on clinical research QA) and departmental procedures for quality control, plus there are two institutional committees that are responsible for monitoring the activities of our clinical trials programs. The committees: *Data and Safety Monitoring Committee (DSMC)* for Phase I and II clinical trials, and the *Data and Safety Monitoring Board (DSMB)* for Phase III clinical trials, report to the Center's Research Council and Institutional Review Board.

During the protocol development and review process, each protocol is assessed for the level of risk and degree of monitoring required. Every type of protocol (e.g., NIH sponsored, in house sponsored, industrial sponsored, NCI cooperative group, etc.) will be addressed and the monitoring procedures will be established at the time of protocol activation.

## 17.0 PROTECTION OF HUMAN SUBJECTS

### Inclusion of Children in Research

This protocol/project does not include children because the number of children is limited and because the majority is already accessed by a nationwide pediatric cancer research network. This statement is based on exclusion 4b of the NIH Policy and Guidelines on the Inclusion of Children as Participants in Research Involving Human Subjects.

### Risks, Benefits, Toxicities/side effects

Potential risks to human subjects include drug related toxicity, placement of IV catheters, phlebotomy, and possible psychological discomfort from the stresses associated with obtaining imaging studies (e.g., CT scan, PET scan). All efforts will be made to avoid any complication by completely reviewing patients' symptoms, providing appropriate management, and monitoring blood tests.

If an adverse medical event occurs, the patient will first contact the primary oncologist or the Principal Investigator. At nights and on weekends, there is an oncology physician on call at all times. Patients may either call or come directly to the urgent care center at Memorial Hospital (or to their local emergency room) to be seen. Patients suffering serious adverse reactions must be carefully followed and all follow-up information also recorded.

### Alternatives/options

Participation in this trial is voluntary. Depending on the specific details of the situation, patient options without being in a study might include:

- Other palliative chemotherapy off study.
- Participation in a different clinical trial
- Best supportive care

#### Financial Costs/Burdens

The patient will be responsible for all costs related to treatment and complications of treatment. Costs to the patient (third party insurer) will include hospitalizations, routine blood tests and diagnostic studies, office visits, baseline EKG, and doctor's fees. Patients will not be charged the cost of analysis for the research correlates. The patient also will not be charged for the subsequent research analysis of these specimens. Nivolumab and ipilimumab is provided by BMS and therefore is not billable to research participants.

#### **17.1 Privacy**

MSK's Privacy Office may allow the use and disclosure of protected health information pursuant to a completed and signed Research Authorization form. The use and disclosure of protected health information will be limited to the individuals described in the Research Authorization form. A Research Authorization form must be completed by the Principal Investigator and approved by the IRB and Privacy Board (IRB/PB).

It is also stated in the consent and Research Authorization that research data (e.g. genomic sequence) may be placed into databases monitored by the National Institutes of Health, and may be made accessible to investigators approved by the U.S. government. It is difficult to identify genotype/phenotype specifics since multiple diseases are studied under the auspices of this protocol and therefore, the requirements for submission of genotype/phenotype data into the NIH GWAS Repository (or any other public database) will be followed as per the MSKCC IRB GWAS SOP-503.

#### **17.2 Serious Adverse Event (SAE) Reporting**

An adverse event is considered serious if it results in ANY of the following outcomes:

- Death
- A life-threatening adverse event
- An adverse event that results in inpatient hospitalization or prolongation of existing hospitalization
- A persistent or significant incapacity or substantial disruption of the ability to conduct normal life functions
- A congenital anomaly/birth defect
- Important Medical Events (IME) that may not result in death, be life threatening, or require hospitalization may be considered serious when, based upon medical judgment, they may jeopardize the patient or participant and may require medical or surgical intervention to prevent one of the outcomes listed in this definition



Note: Hospital admission for a planned procedure/disease treatment is not considered an SAE.

SAE reporting is required as soon as the participant starts investigational treatment/intervention. SAE reporting is required for 30-days after the participant's last investigational treatment/intervention. Any event that occur after the 30-day period that is unexpected and at least possibly related to protocol treatment must be reported.

Please note: Any SAE that occurs prior to the start of investigational treatment/intervention and is related to a screening test or procedure (i.e., a screening biopsy) must be reported.

All SAEs must be submitted in PIMS. If an SAE requires submission to the HRPP office per IRB SOP RR-408 'Reporting of Serious Adverse Events', the SAE report must be submitted within 5 calendar days of the event. All other SAEs must be submitted within 30 calendar days of the event.

The report should contain the following information:

- The data the adverse event occurred
- The adverse event
- The grade of the event
- Relationship of the adverse event to treatment(s)
- If the AE was expected
- Detailed text that includes the following
  - An explanation of how the AE was handled
  - A description of the participant's condition
  - Indication if the participant remains on the study
- If an amendment will need to be made to the protocol and/or consent form
- If the SAE is an Unanticipated Problem

For IND/IDE protocols:

The SAE report should be completed as per above instructions. If appropriate, the report will be forwarded to the FDA by the IND Office

[REDACTED]

[REDACTED]

[REDACTED]

[REDACTED]

[REDACTED]

[REDACTED]

[REDACTED]

[REDACTED]

[Redacted text block]

## 18.0 INFORMED CONSENT PROCEDURES

Before protocol-specified procedures are carried out, consenting professionals will explain full details of the protocol and study procedures as well as the risks involved to participants prior to their inclusion in the study. Participants will also be informed that they are free to withdraw from the study at any time. All participants must sign an IRB/PB-approved consent form indicating their consent to participate. This consent form meets the requirements of the Code of Federal Regulations and the Institutional Review Board/Privacy Board of this Center. The consent form will include the following:

1. The nature and objectives, potential risks and benefits of the intended study.
2. The length of study and the likely follow-up required.
3. Alternatives to the proposed study. (This will include available standard and investigational therapies. In addition, patients will be offered an option of supportive care for therapeutic studies.)
4. The name of the investigator(s) responsible for the protocol.
5. The right of the participant to accept or refuse study interventions/interactions and to withdraw from participation at any time.

Before any protocol-specific procedures can be carried out, the consenting professional will fully explain the aspects of patient privacy concerning research specific information. In addition to signing the IRB Informed Consent, all patients must agree to the Research Authorization component of the informed consent form.

Each participant and consenting professional will sign the consent form. The participant must receive a copy of the signed informed consent form.

## 19.0 REFERENCES

1. Speight PM, Barrett AW: Salivary gland tumours. *Oral Dis* 8:229-40, 2002
2. Barnes L, Eveson JW, Reichart P, Sidransky D: World Health Organization classification of tumours. Pathology and genetics of head and neck tumours. Lyon, France, IARC Press, 2005, pp 430
3. Laurie SA, Ho AL, Fury MG, Sherman E, Pfister DG: Systemic therapy in the management of metastatic or locally recurrent adenoid cystic carcinoma of the salivary glands: a systematic review. *Lancet Oncol*, 2010
4. Laurie SA, Licitra L: Systemic therapy in the palliative management of advanced salivary gland cancers. *J Clin Oncol* 24:2673-8, 2006
5. Ho AS, Kannan K, Roy DM, Morris LG, Ganly I, Katabi N, Ramaswami D, Walsh LA, Eng S, Huse JT, Zhang J, Dolgalev I, Huberman K, Heguy A, Viale A, Drobnjak M, Leversha MA, Rice CE, Singh B, Iyer NG, Leemans CR, Bloemena E, Ferris RL, Seethala RR, Gross BE, Liang Y, Sinha R, Peng L, Raphael BJ, Turcan S, Gong Y, Schultz N, Kim S, Chiosea S, Shah JP, Sander C, Lee W, Chan TA: The mutational landscape of adenoid cystic carcinoma. *Nat Genet* 45:791-8, 2013
6. Persson M, Andren Y, Mark J, Horlings HM, Persson F, Stenman G: Recurrent fusion of MYB and NFIB transcription factor genes in carcinomas of the breast and head and neck. *Proc Natl Acad Sci U S A* 106:18740-4, 2009

7. Dalin MG, Desrichard A, Katabi N, Makarov V, Walsh LA, Lee KW, Wang Q, Armenia J, West L, Dogan S, Wang L, Ramaswami D, Ho AL, Ganly I, Solit DB, Berger MF, Schultz ND, Reis-Filho JS, Chan TA, Morris LG: Comprehensive Molecular Characterization of Salivary Duct Carcinoma Reveals Actionable Targets and Similarity to Apocrine Breast Cancer. *Clin Cancer Res*, 2016
8. Airoidi M, Pedani F, Succo G, Gabriele AM, Ragona R, Marchionatti S, Bumma C: Phase II randomized trial comparing vinorelbine versus vinorelbine plus cisplatin in patients with recurrent salivary gland malignancies. *Cancer* 91:541-7, 2001
9. Locati LD, Bossi P, Civelli EM, Perrone F, Bergamini C, Cortelazzi B, Quattrone P, Imbimbo M, Mirabile A, Granata R, Resteghini C, Mariani L, Tosarello D, Cassani C, Alfonso M, Saibene G, Pilotti S, Licitra L: Sorafenib in recurrent and/or metastatic salivary gland carcinomas (RMSGCs): An investigator-initiated phase II trial (NCT01703455). *J Clin Oncol* 31 suppl; abstr 6020, 2013
10. Mukaigawa T, Hayashi R, Hashimoto K, Ugumori T, Hato N, Fujii S: Programmed death ligand-1 expression is associated with poor disease free survival in salivary gland carcinomas. *J Surg Oncol* 114:36-43, 2016
11. Cohen RB, Delord J, Doi T, Piha-Paul SA, Liu SV, Gilbert J, Algazi AP, Cresta S, Hong RL, Le Tourneau C, Day D, Varga A, Elez E, Wallmark JM, Saraf S, Morosky A, Cheng JD, Keam B: Preliminary results for the advanced salivary gland carcinoma cohort of the phase 1b KEYNOTE-028 study of pembrolizumab. *J Clin Oncol* 34, 2016
12. Callahan MK, Postow MA, Wolchok JD: CTLA-4 and PD-1 Pathway Blockade: Combinations in the Clinic. *Front Oncol* 4:385, 2014
13. Curran MA, Montalvo W, Yagita H, Allison JP: PD-1 and CTLA-4 combination blockade expands infiltrating T cells and reduces regulatory T and myeloid cells within B16 melanoma tumors. *Proc Natl Acad Sci U S A* 107:4275-80, 2010
14. Hodi FS, Chesney J, Pavlick AC, Robert C, Grossmann KF, McDermott DF, Linette GP, Meyer N, Giguere JK, Agarwala SS, Shaheen M, Ernstoff MS, Minor DR, Salama AK, Taylor MH, Ott PA, Horak C, Gagnier P, Jiang J, Wolchok JD, Postow MA: Combined nivolumab and ipilimumab versus ipilimumab alone in patients with advanced melanoma: 2-year overall survival outcomes in a multicentre, randomised, controlled, phase 2 trial. *Lancet Oncol*, 2016
15. Larkin J, Chiarion-Sileni V, Gonzalez R, Grob JJ, Cowey CL, Lao CD, Schadendorf D, Dummer R, Smylie M, Rutkowski P, Ferrucci PF, Hill A, Wagstaff J, Carlino MS, Haanen JB, Maio M, Marquez-Rodas I, McArthur GA, Ascierto PA, Long GV, Callahan MK, Postow MA, Grossmann K, Sznol M, Dreno B, Bastholt L, Yang A, Rollin LM, Horak C, Hodi FS, Wolchok JD: Combined Nivolumab and Ipilimumab or Monotherapy in Untreated Melanoma. *N Engl J Med* 373:23-34, 2015
16. Postow MA, Chesney J, Pavlick AC, Robert C, Grossmann K, McDermott D, Linette GP, Meyer N, Giguere JK, Agarwala SS, Shaheen M, Ernstoff MS, Minor D, Salama AK, Taylor M, Ott PA, Rollin LM, Horak C, Gagnier P, Wolchok JD, Hodi FS: Nivolumab and ipilimumab versus ipilimumab in untreated melanoma. *N Engl J Med* 372:2006-17, 2015
17. Wolchok JD, Kluger H, Callahan MK, Postow MA, Rizvi NA, Lesokhin AM, Segal NH, Ariyan CE, Gordon RA, Reed K, Burke MM, Caldwell A, Kronenberg SA, Agunwamba BU, Zhang X, Lowy I, Inzunza HD, Feely W, Horak CE, Hong Q, Korman AJ, Wigginton JM, Gupta A, Sznol M: Nivolumab plus ipilimumab in advanced melanoma. *N Engl J Med* 369:122-33, 2013
18. Peggs KS, Quezada SA, Chambers CA, Korman AJ, Allison JP: Blockade of CTLA-4 on both effector and regulatory T cell compartments contributes to the antitumor activity of anti-CTLA-4 antibodies. *J Exp Med* 206:1717-25, 2009

19. Romano E, Kusio-Kobialka M, Foukas PG, Baumgaertner P, Meyer C, Ballabeni P, Michielin O, Weide B, Romero P, Speiser DE: Ipilimumab-dependent cell-mediated cytotoxicity of regulatory T cells ex vivo by nonclassical monocytes in melanoma patients. *Proc Natl Acad Sci U S A* 112:6140-5, 2015

20. Haghshenas MR, Khademi B, Faghieh Z, Ghaderi A, Erfani N: Immune regulatory cells and IL17-producing lymphocytes in patients with benign and malignant salivary gland tumors. *Immunol Lett* 164:109-16, 2015

21. Hellmann MD, Rizvi NA, Goldman JW, Gettinger SN, Borghaei H, Brahmer JR, Ready NE, Gerber DE, Chow LQ, Juergens RA, Shepherd FA, Laurie SA, Geese WJ, Agrawal S, Young TC, Li X, Antonia SJ: Nivolumab plus ipilimumab as first-line treatment for advanced non-small-cell lung cancer (CheckMate 012): results of an open-label, phase 1, multicohort study. *Lancet Oncol* 18:31-41, 2017

## **20.0 APPENDICES**

**Appendix 1:** Sample of Drug Ordering and Pharmacy Reference Material

**Appendix 2:** Adverse Event Reporting

**Appendix 3:** Management Algorithms

[REDACTED]

[Redacted text block containing multiple paragraphs of obscured content]



[REDACTED]

- █ [REDACTED]
- █ [REDACTED]
- █ [REDACTED]

- █ [REDACTED]



[Redacted]

- [Redacted]
- [Redacted]
- [Redacted]
- [Redacted]
- [Redacted]

[Redacted]

- [Redacted]
- [Redacted]
- [Redacted]

[Redacted]











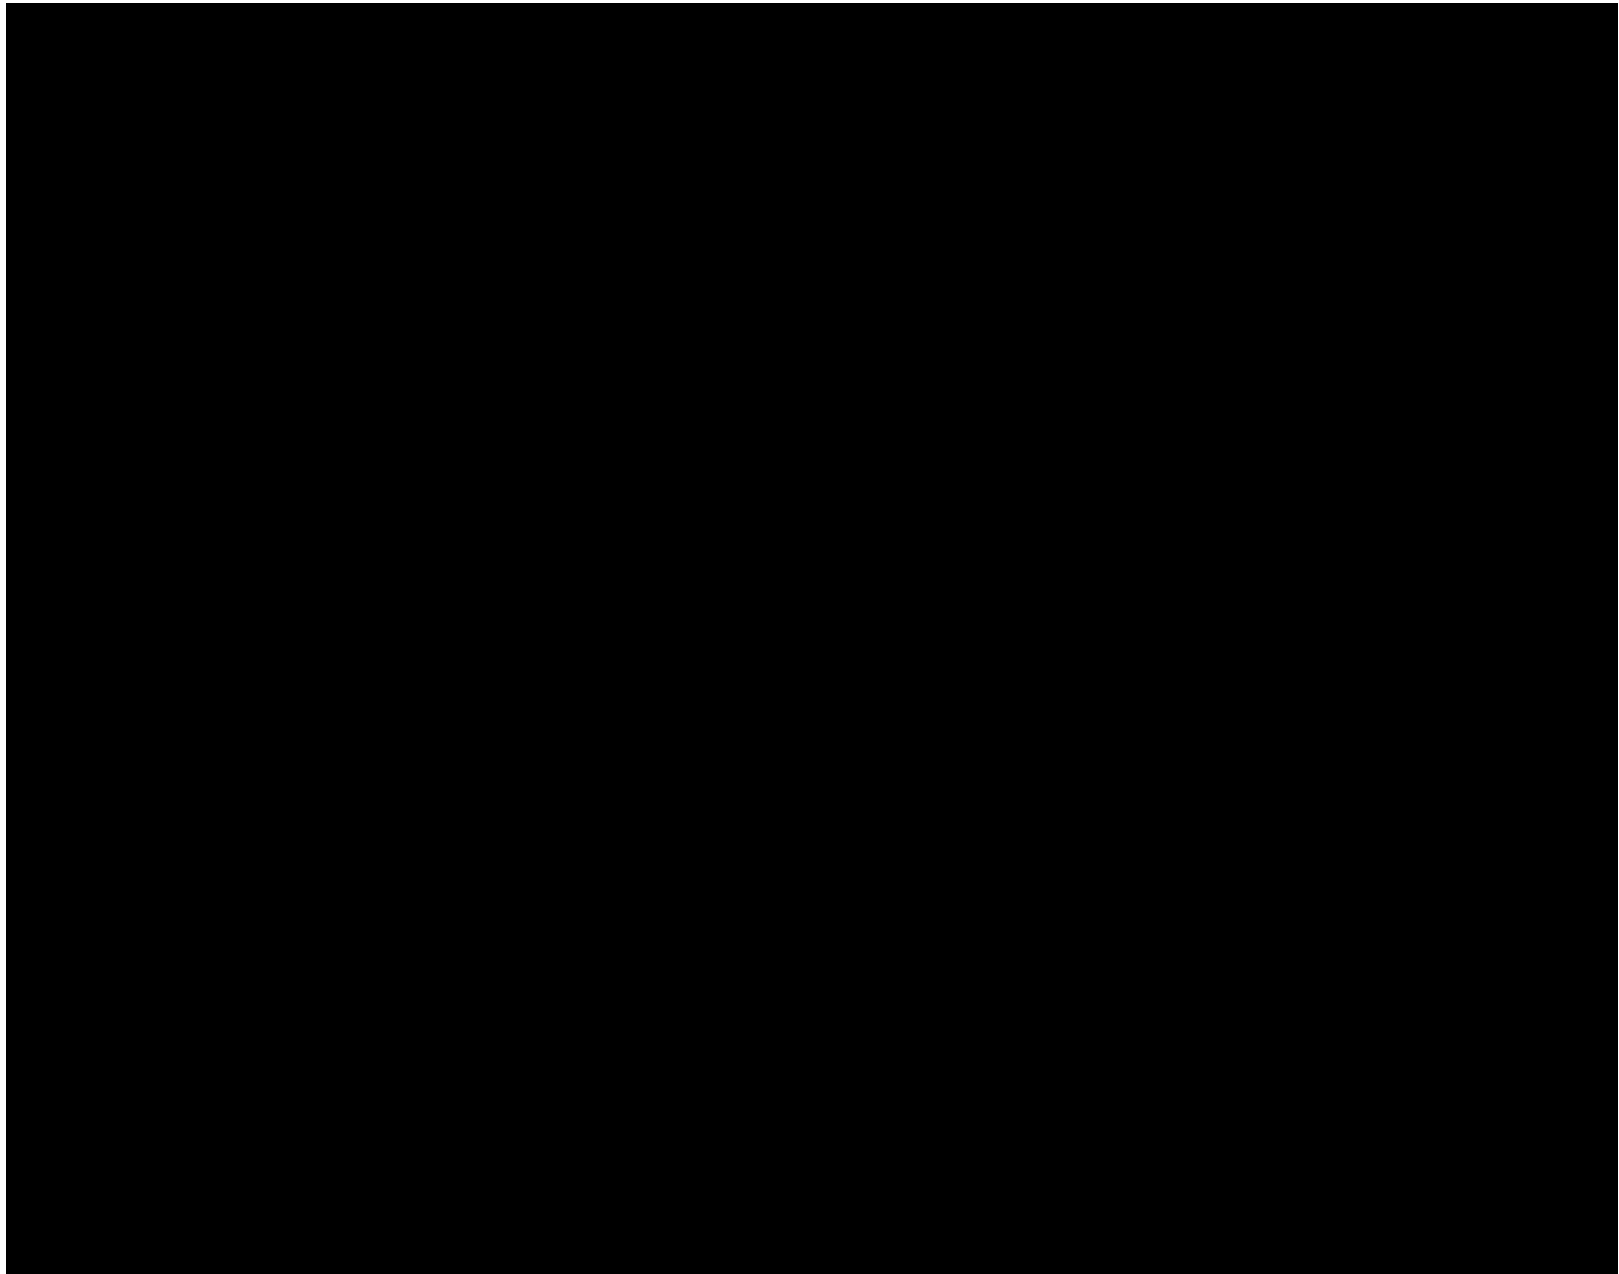

Supplement: NIHMS1992284-supplement-Supplementary_Information_REVISED_V2_pdf.pdf [file NIHMS1992284-supplement-Supplementary_Information_REVISED_V2_pdf.pdf]
